# Supplementary material for: Sex- and context-dependent effects of acute isolation on vocal and non-vocal social behaviors in mice
Source: PubMed Central journal article supplement (PMC8409668; doi:10.1371/journal.pone.0255640), 2021-09-01
Supplement: pone.0255640.s001.pdf [file pone.0255640.s001.pdf]

# S1 Fig. Effects of acute isolation on latency to first USV in same-sex and opposite-sex interactions

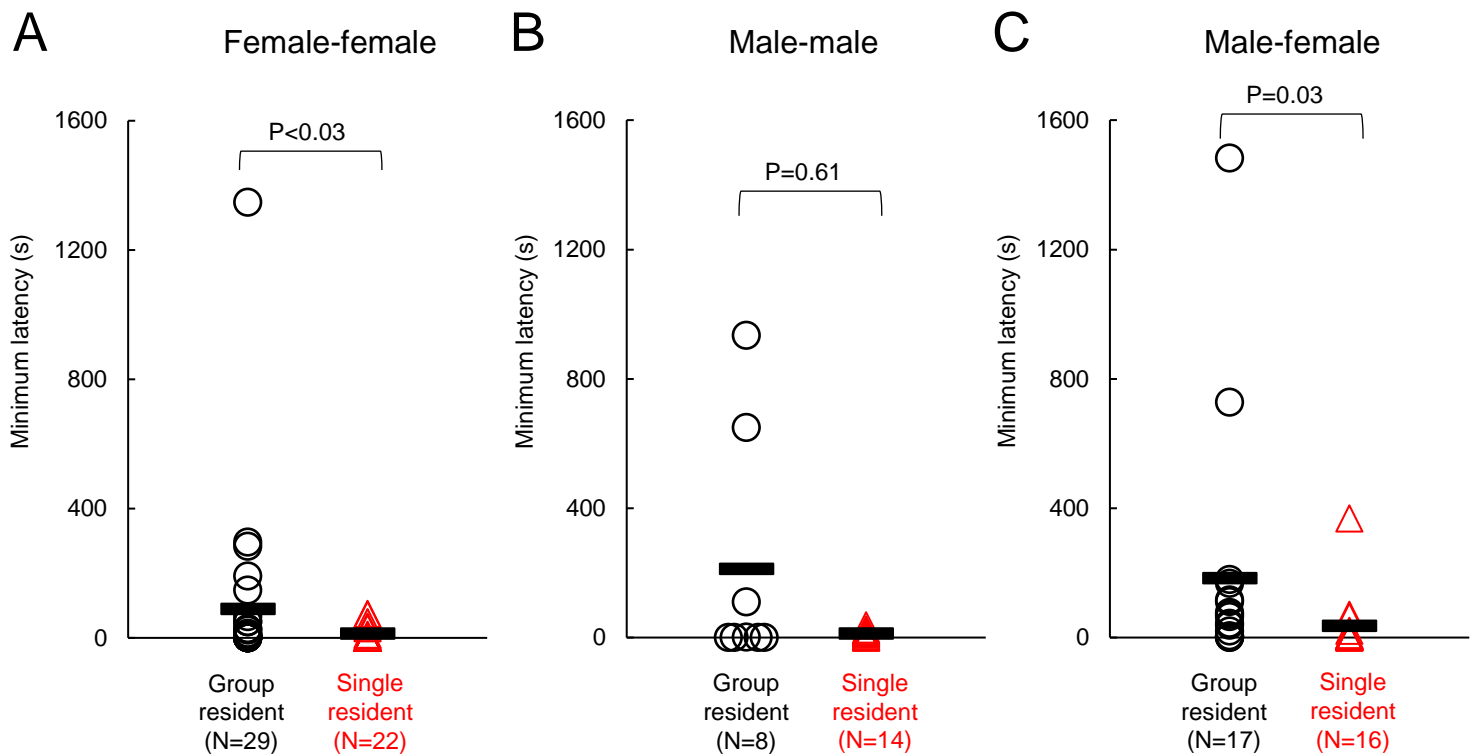

**S1 Fig. Effects of acute isolation on latency to first USV in same-sex and opposite-sex interactions.** Latency to the first recorded USV is shown for female-female social encounters (A), male-male encounters (B), and male-female encounters (C). Trials with 0 USVs are excluded.

# S2 Fig (1/3). Female-female ethograms, group-housed residents

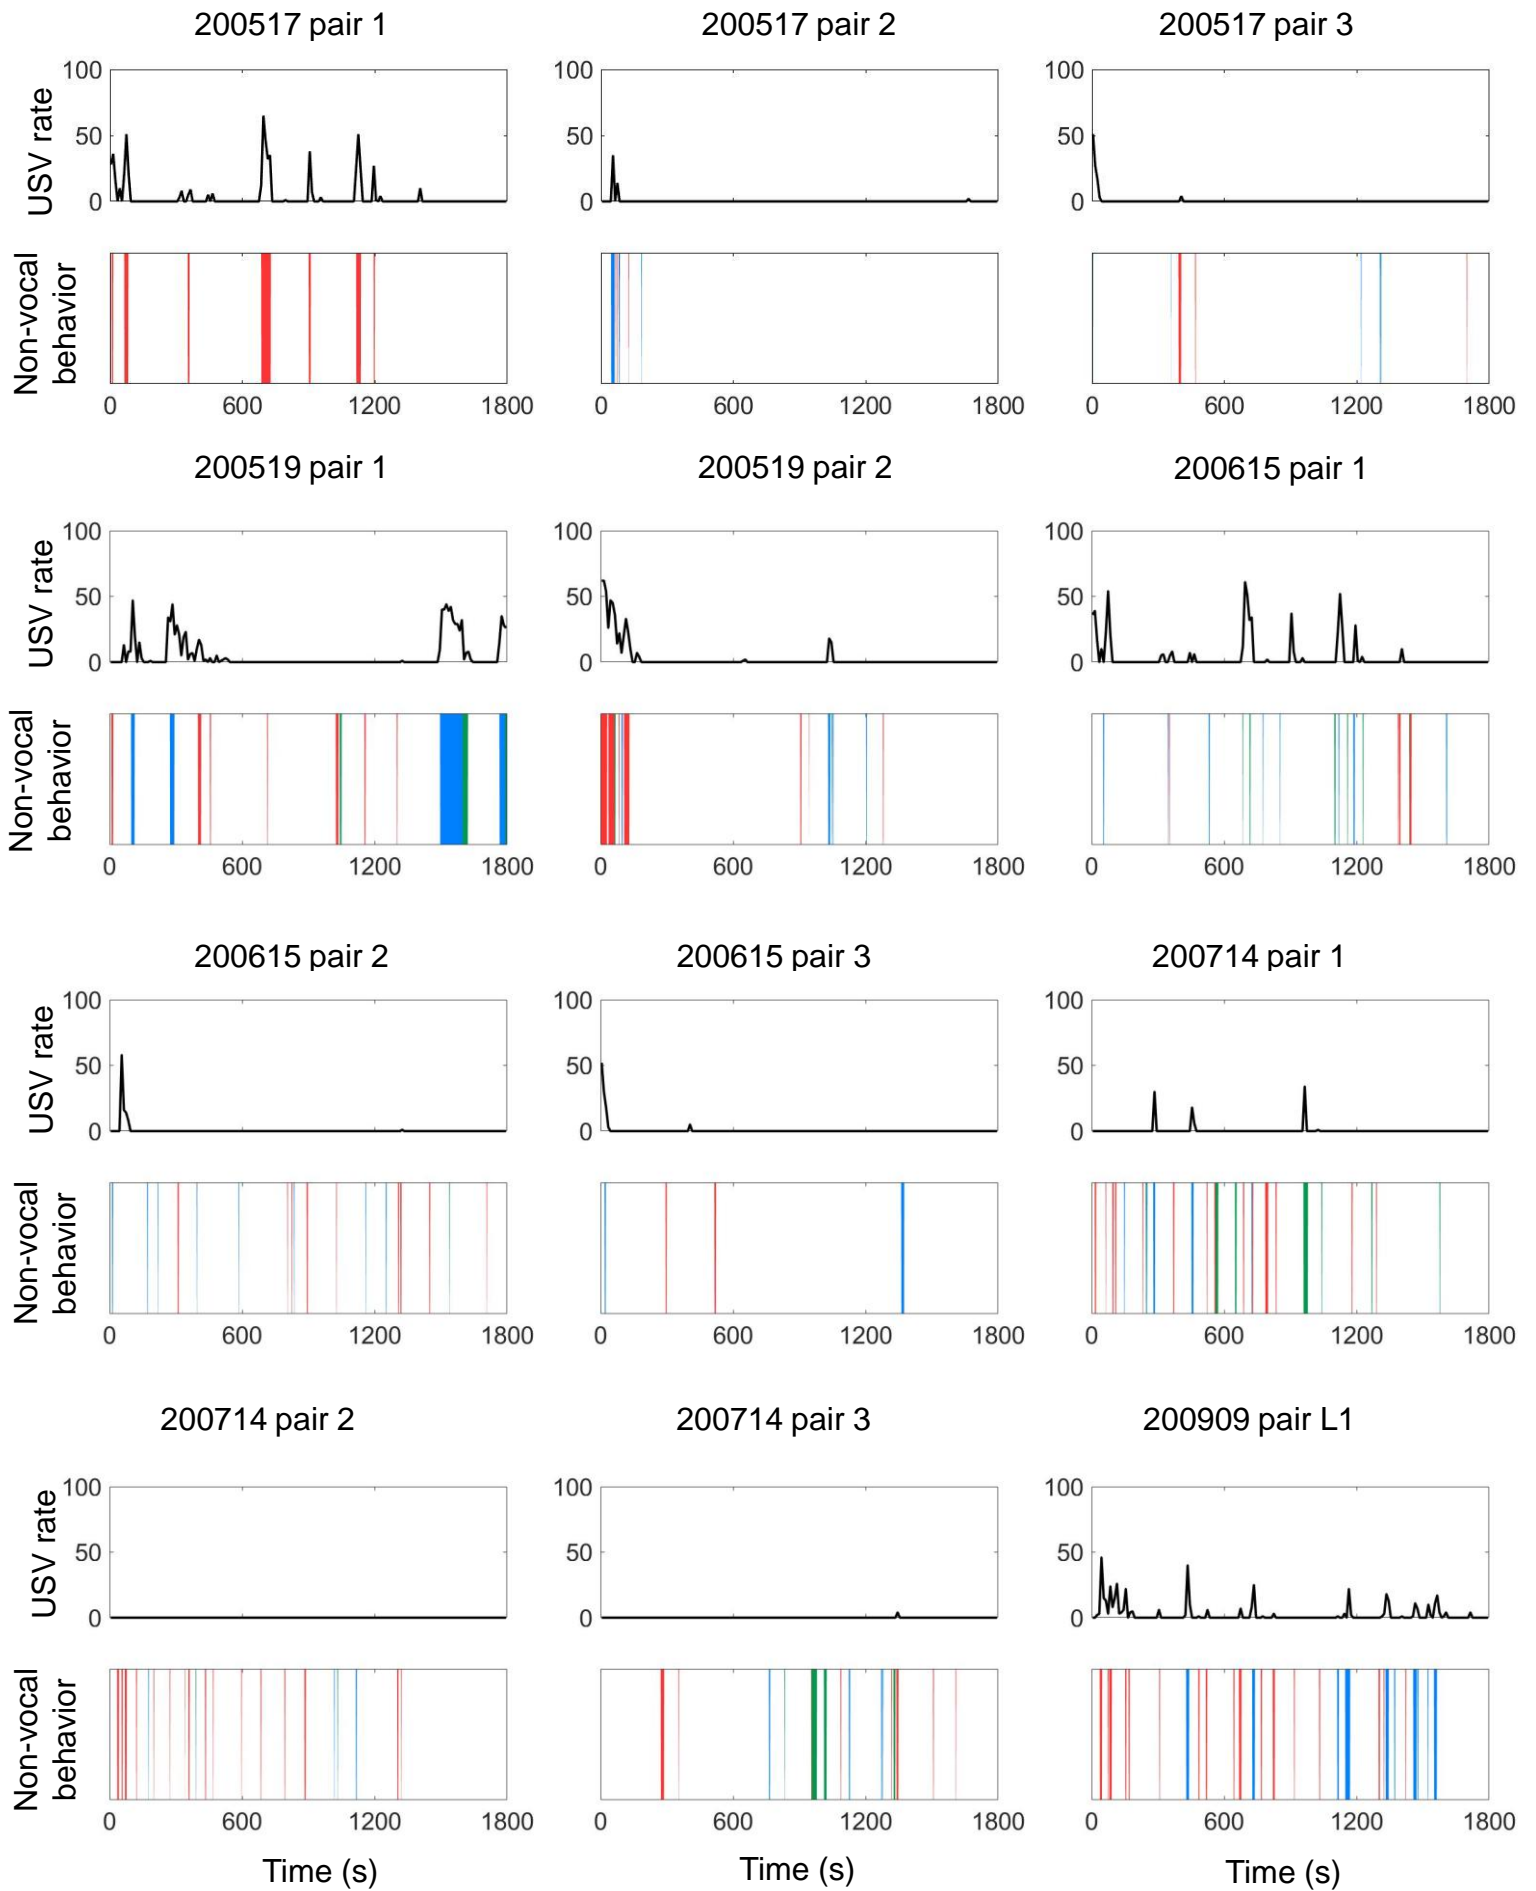

## S2 Fig (2/3). Female-female ethograms, group-housed residents

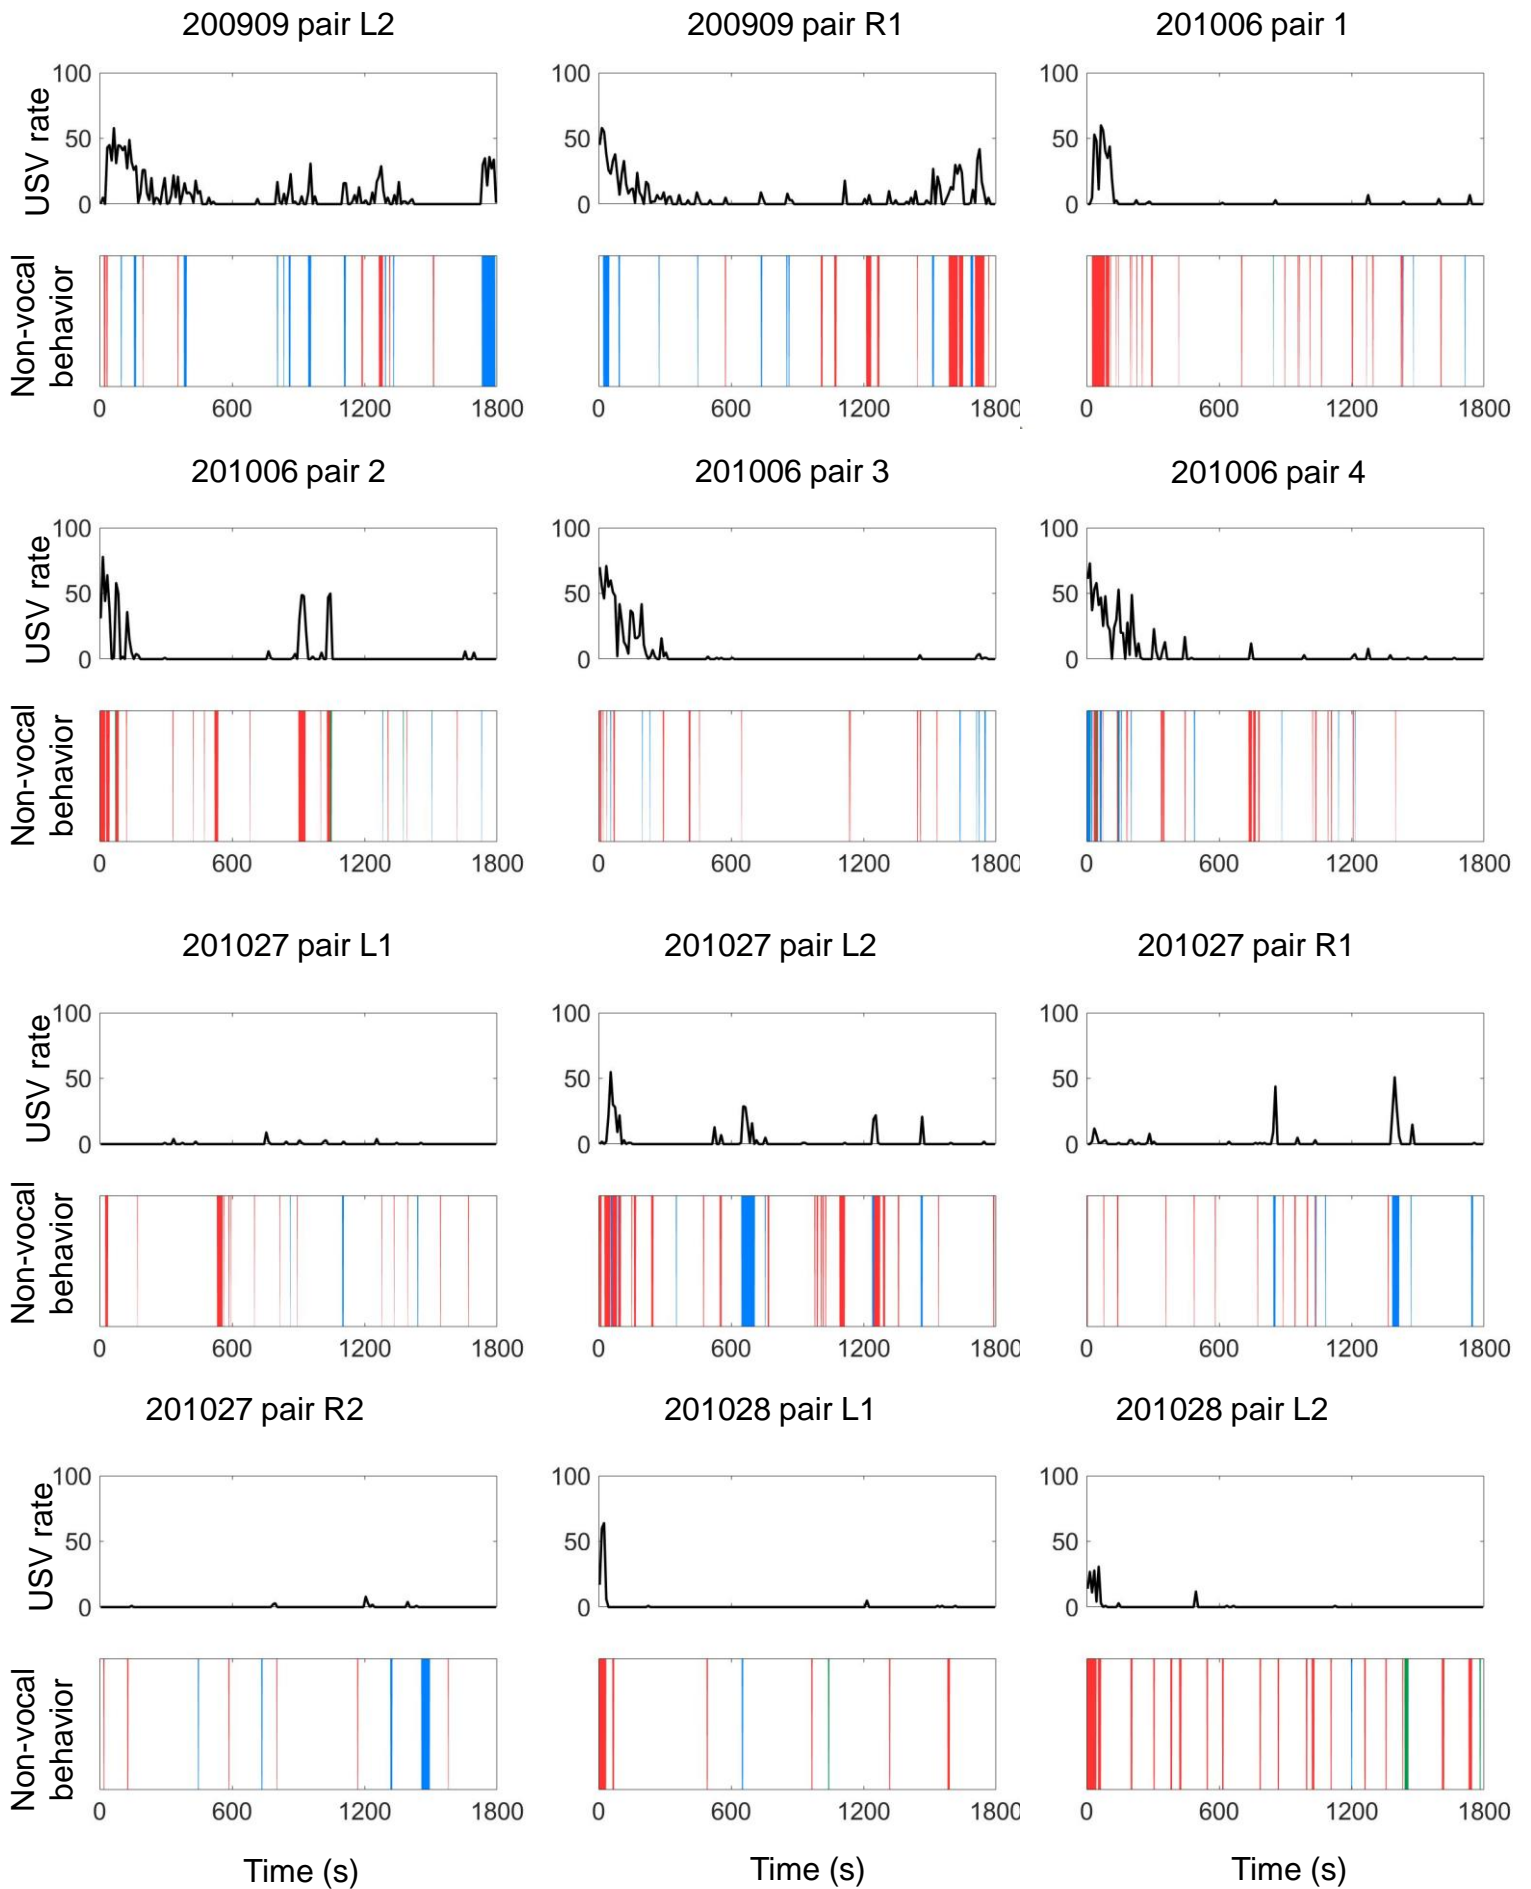

# S2 Fig (3/3). Female-female ethograms, group-housed residents

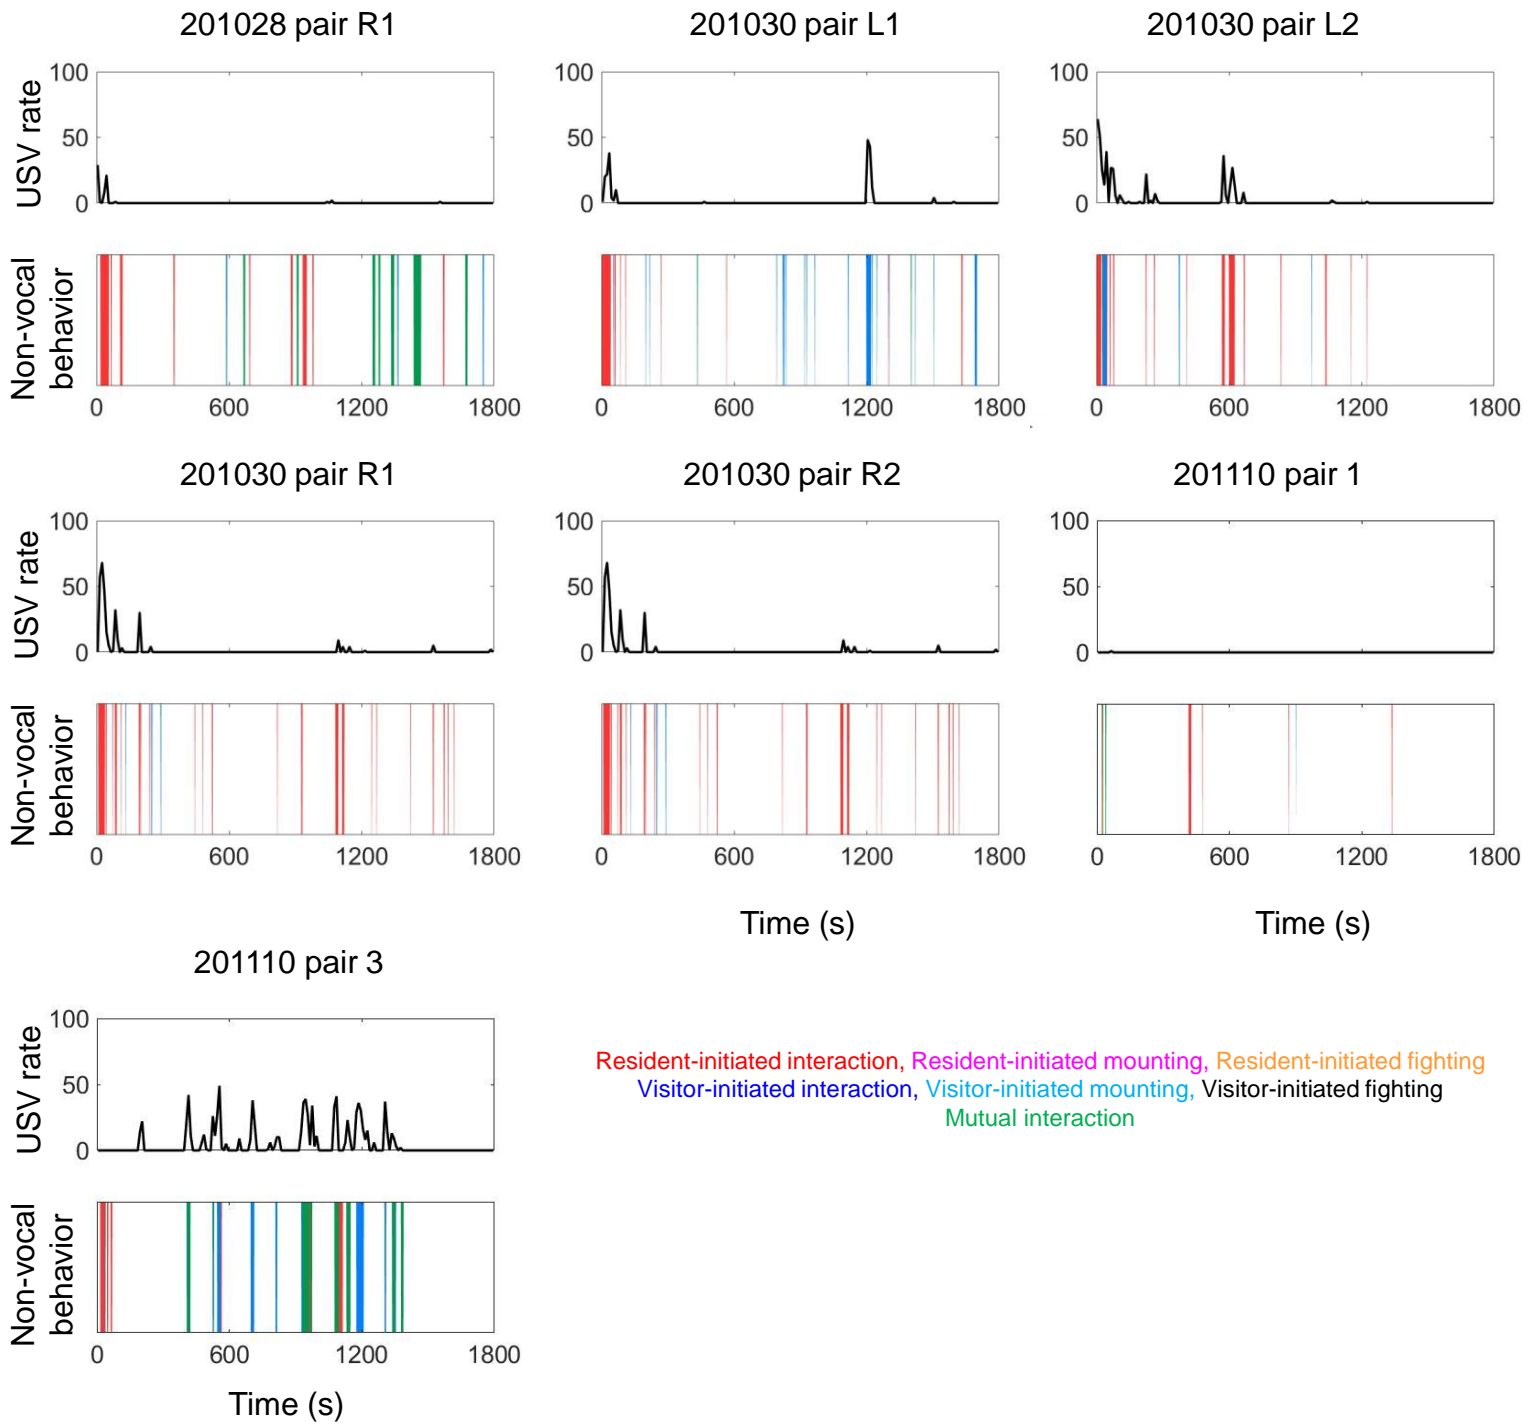

**S2 Fig. Female-female ethograms, group-housed residents.** Ethograms are shown for each female-female trial with a group-housed resident. The top half of each plot shows USV rate over time (total USVs in each 10s-long bin), and the bottom half of each plot shows the occurrence of different non-vocal social behaviors over time. Red, resident-initiated interaction; magenta, resident-initiated mounting; orange, resident-initiated fighting; blue, visitor-initiated interaction; cyan, visitor-initiated mounting; black, visitor-initiated fighting; green, mutual interaction; white, not interacting.

# S3 Fig (1/2). Female-female ethograms, single-housed resident

200514 pair 1

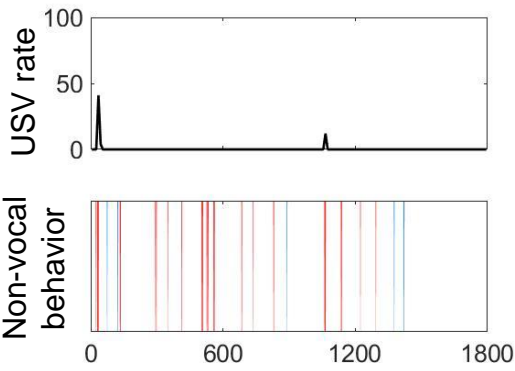

200514 pair 2

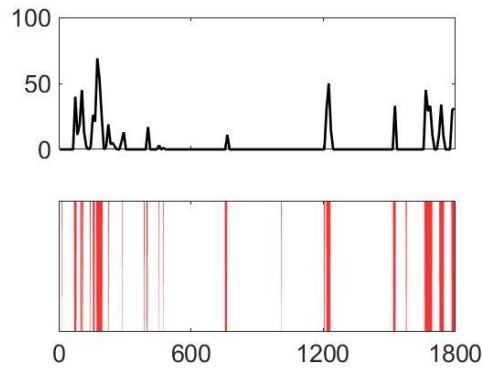

200514 pair 3

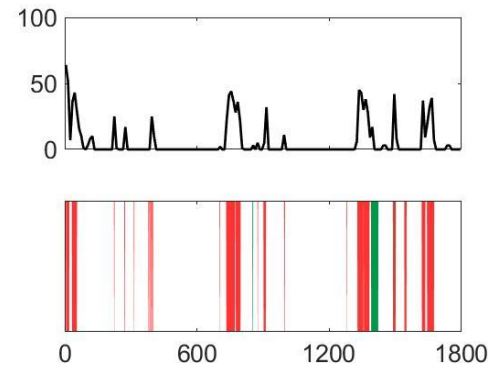

200522 pair 1

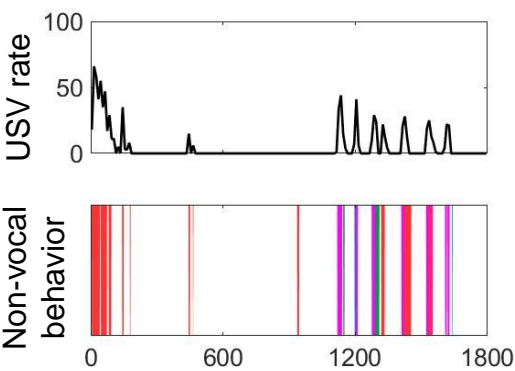

200615 pair 1 (Will)

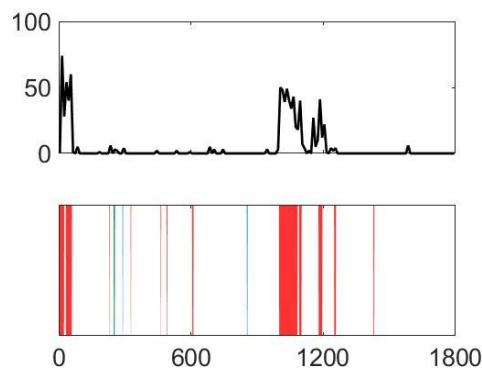

200615 pair 2

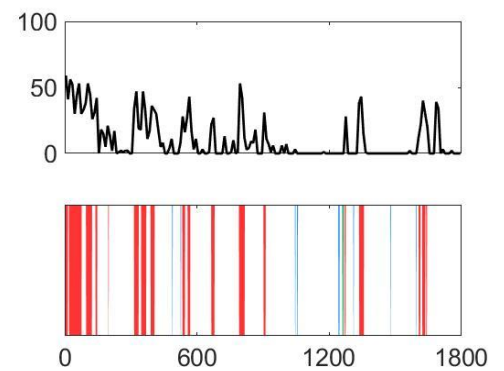

200615 pair 3 (Will)

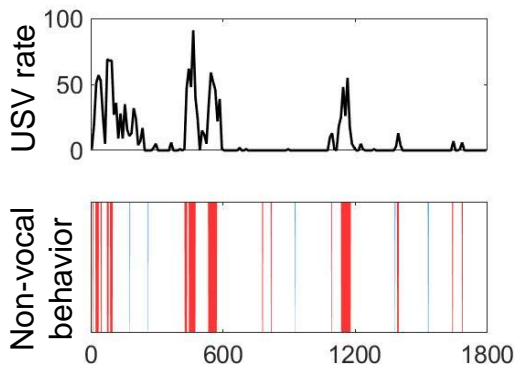

200715 pair 1 (402163)

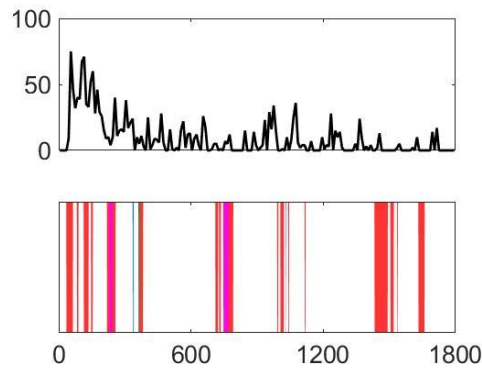

200715 pair 2 (402143)

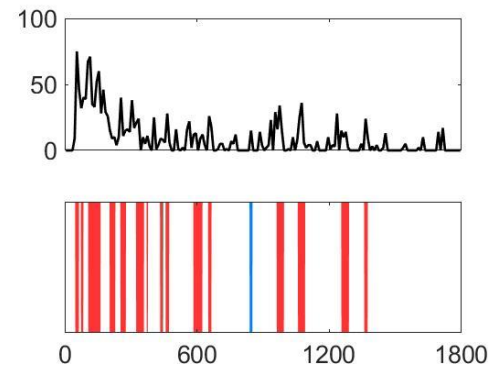

200715 pair 3 (402144)

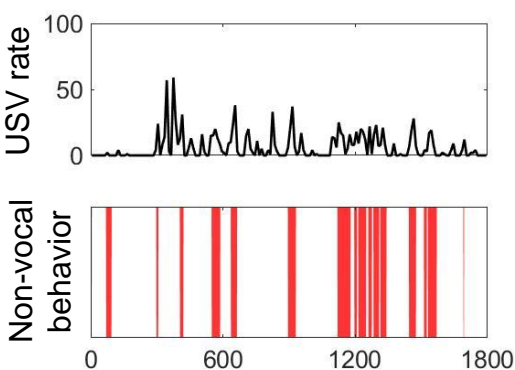

201109 pair 410373

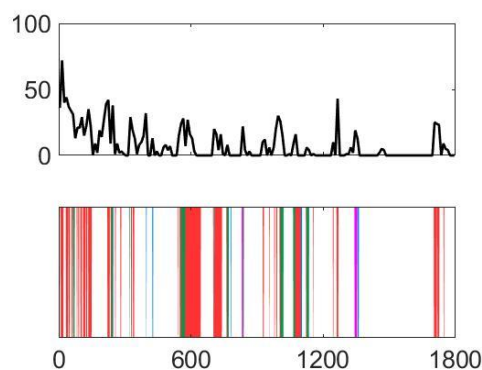

201109 pair 410410

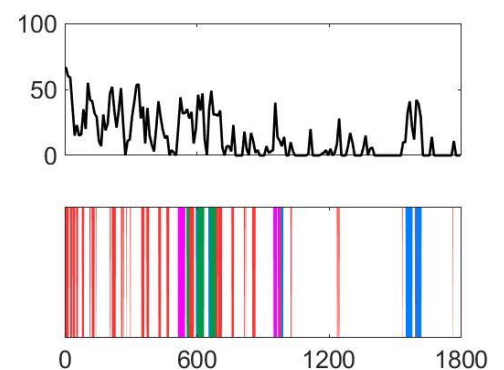

# S3 Fig (2/2). Female-female ethograms, single-housed resident

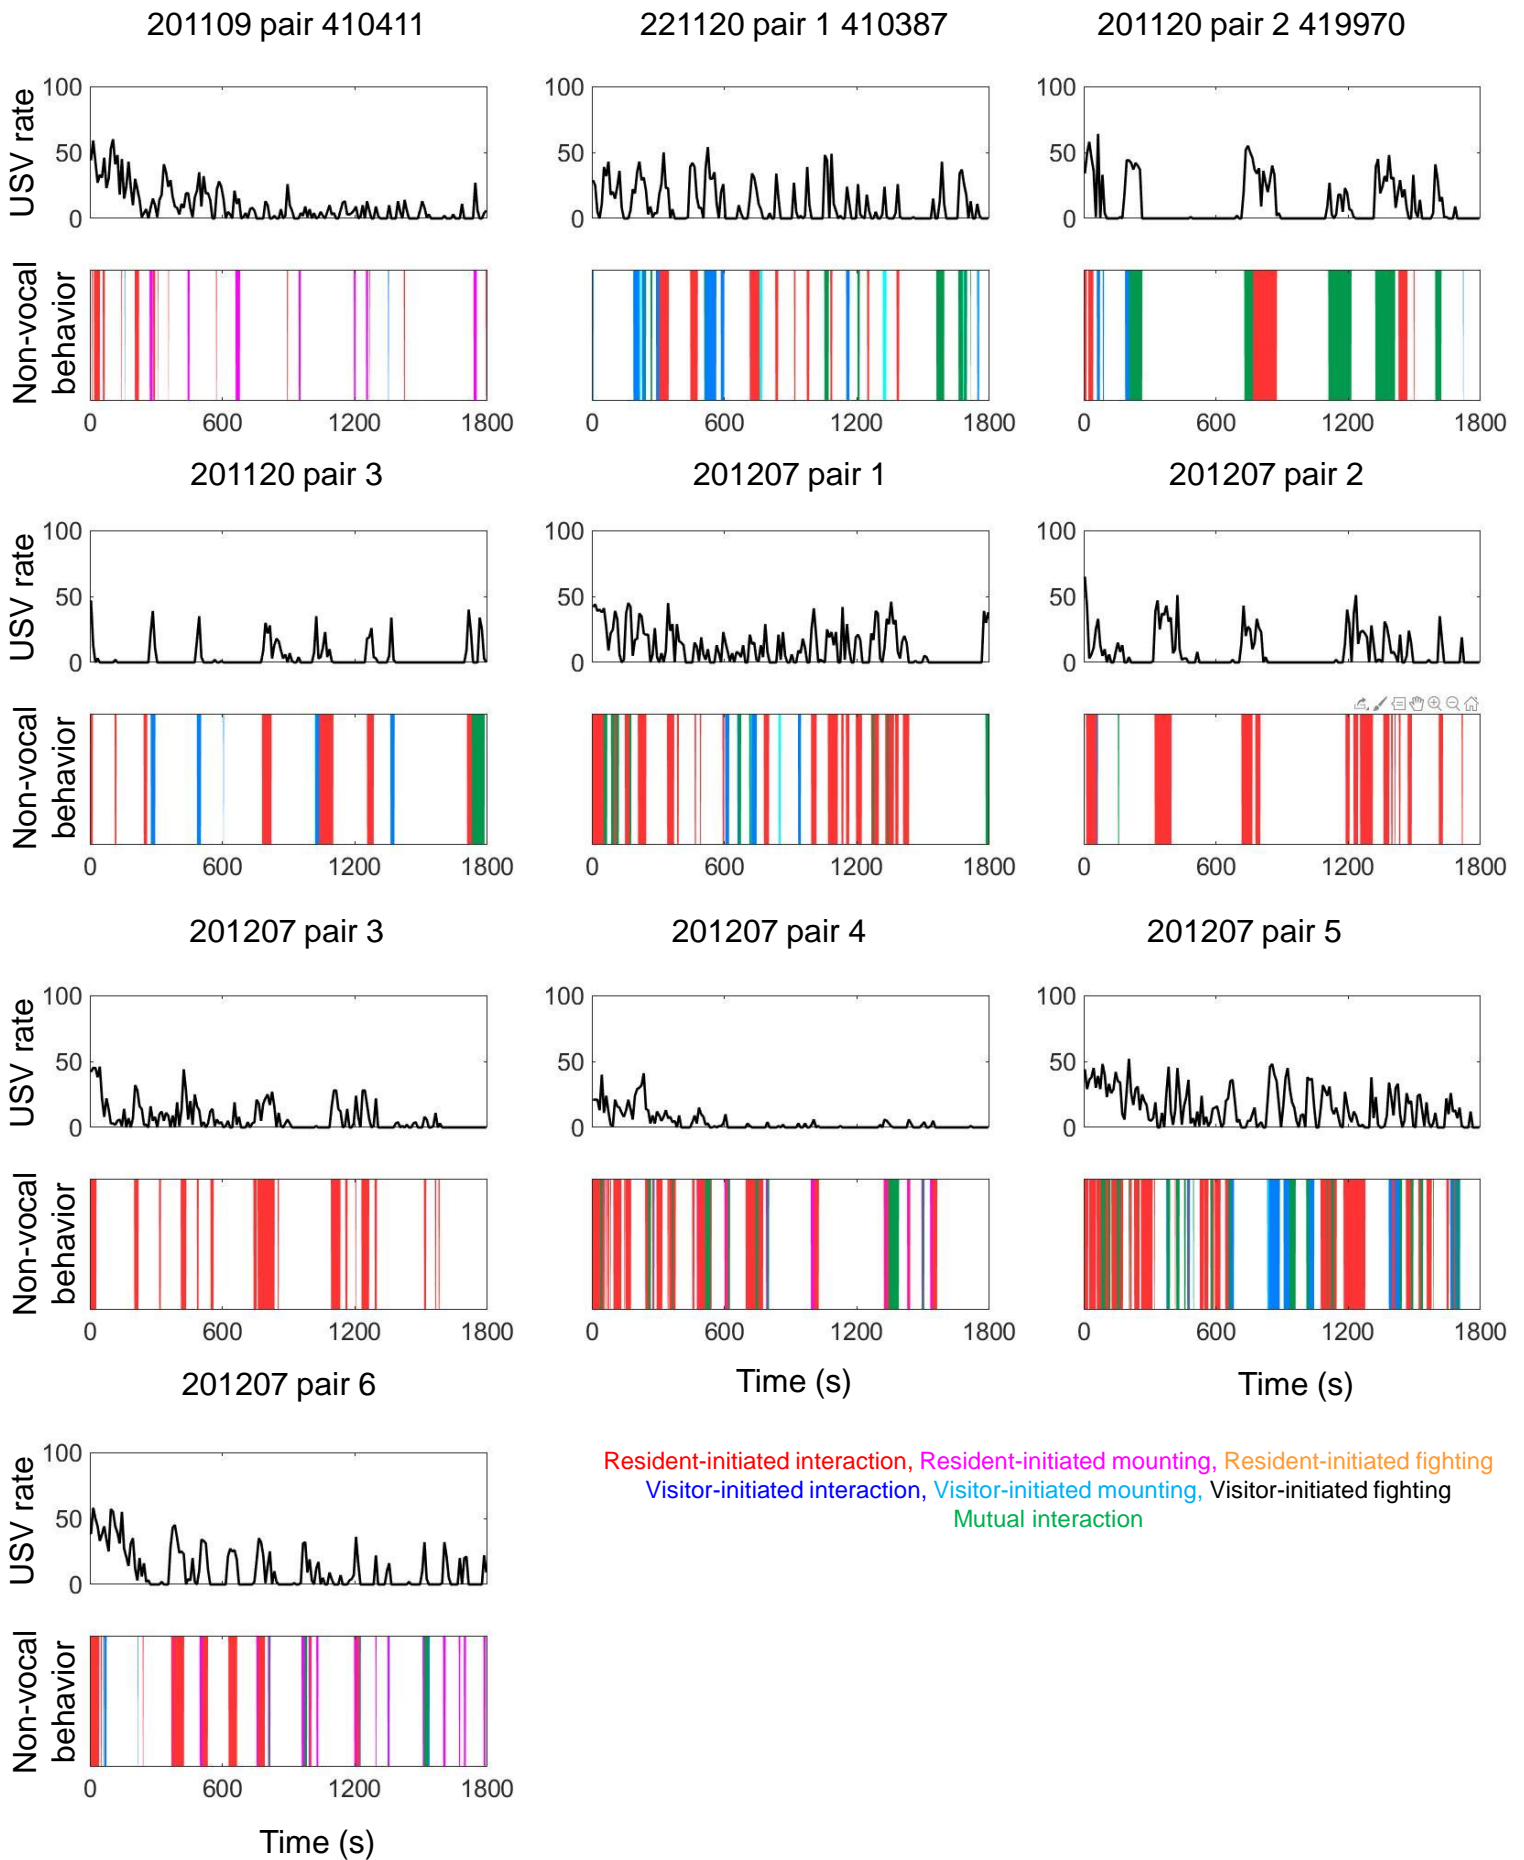

**S3 Fig. Female-female ethograms, single-housed residents.** Ethograms are shown for each female-female trial with a single-housed resident. The top half of each plot shows USV rate over time (total USVs in each 10s-long bin), and the bottom half of each plot shows the occurrence of different non-vocal social behaviors over time. Red, resident-initiated interaction; magenta, resident-initiated mounting; orange, resident-initiated fighting; blue, visitor-initiated interaction; cyan, visitor-initiated mounting; black, visitor-initiated fighting; green, mutual interaction; white, not interacting.



# S4 Fig (1/2). Male-male ethograms, group-housed resident

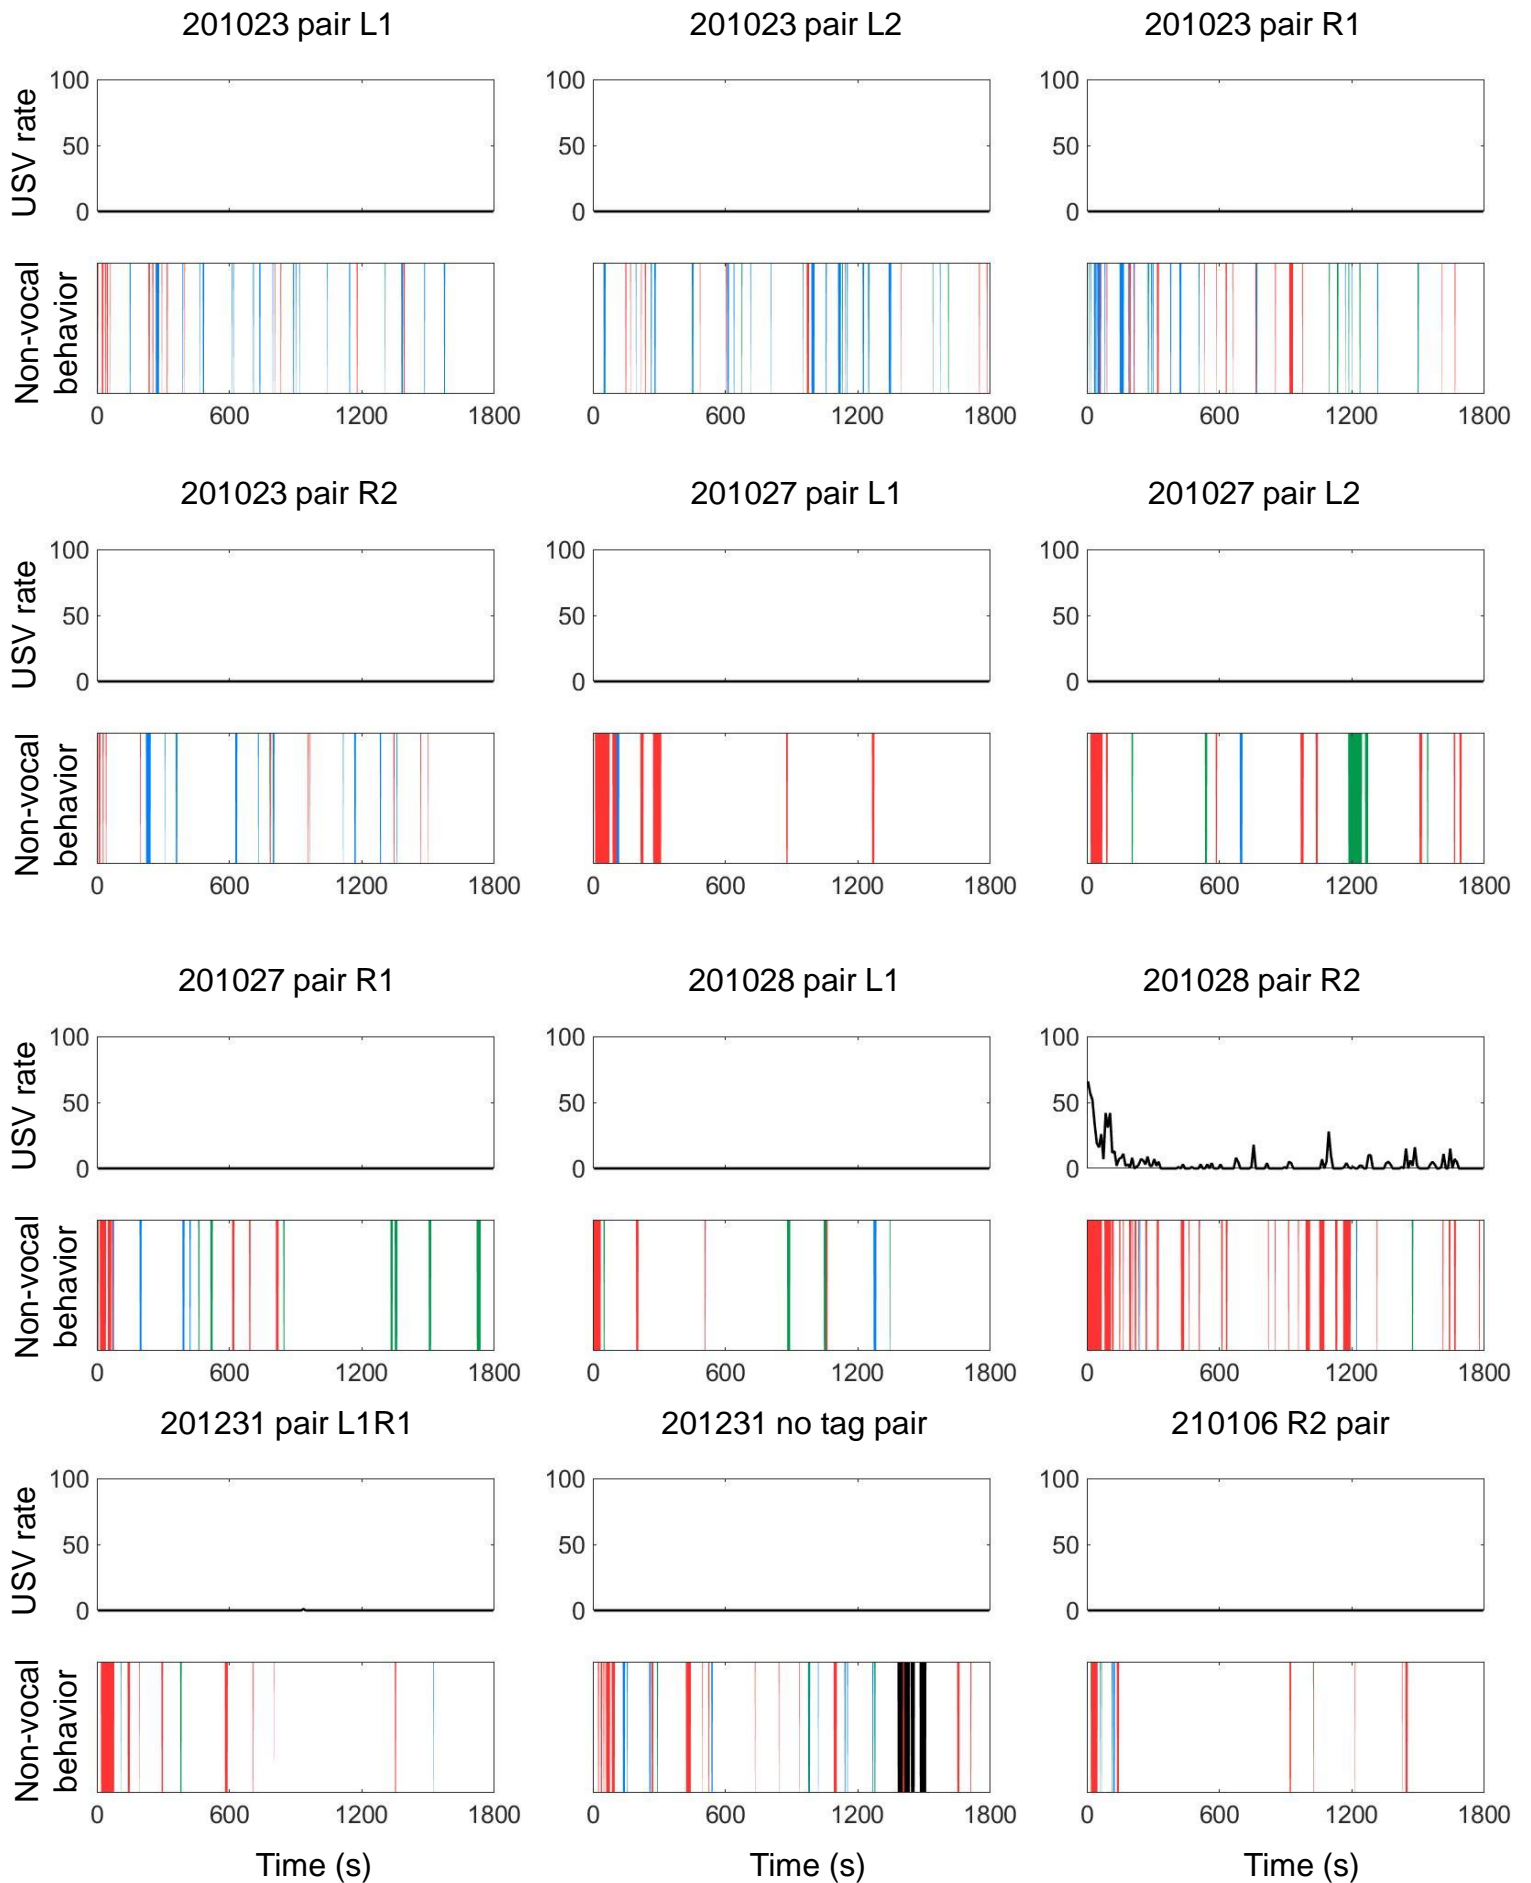

# S4 Fig (2/2). Male-male ethograms, group-housed resident

210106 no tag pair

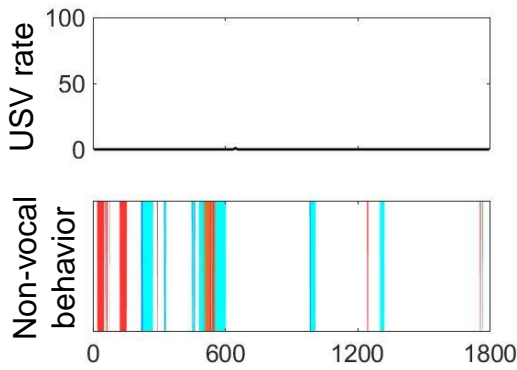

210114 410402 pair 1

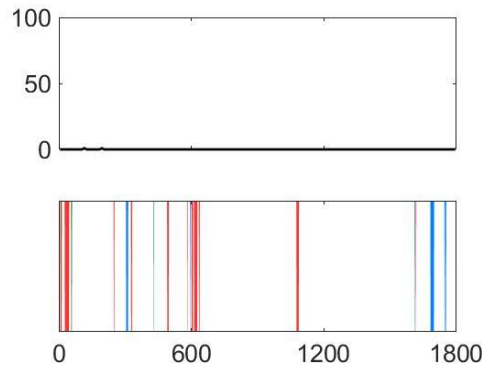

210114 410402 pair 2

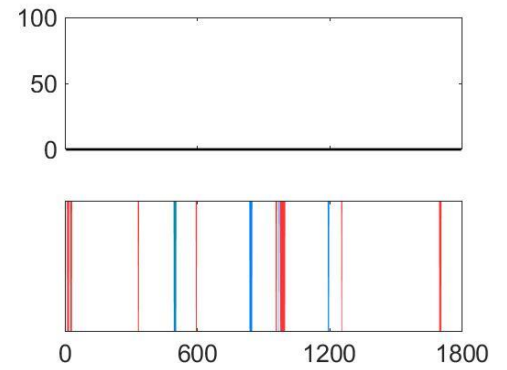

210114 410402 pair 3

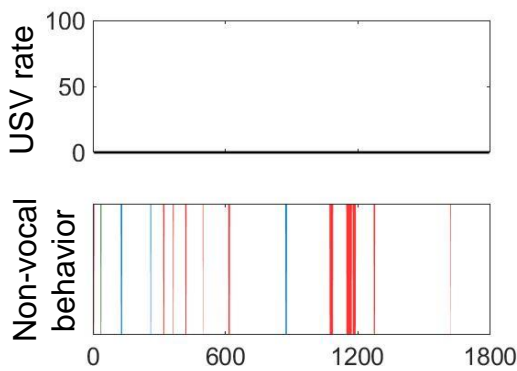

210114 410402 pair 4

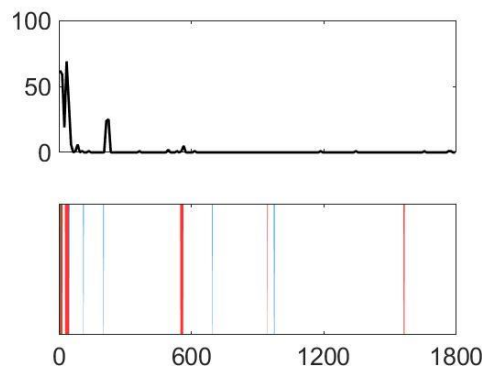

210114 421879 pair 1

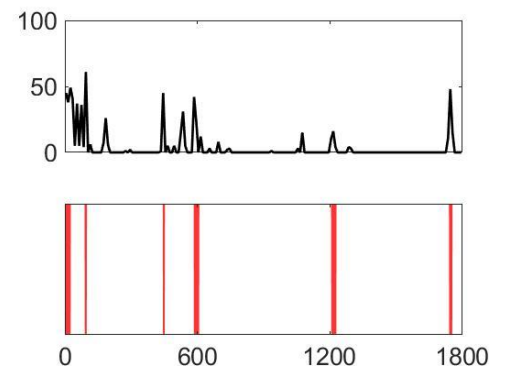

210114 421879 pair 2

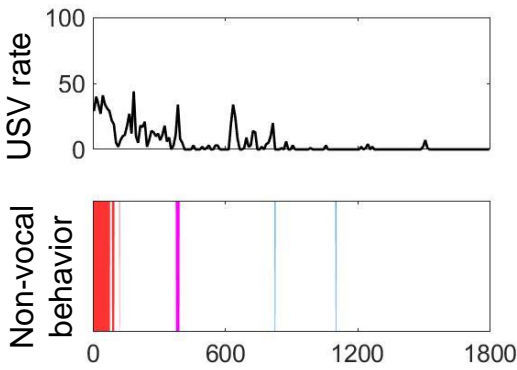

210114 421879 pair 3

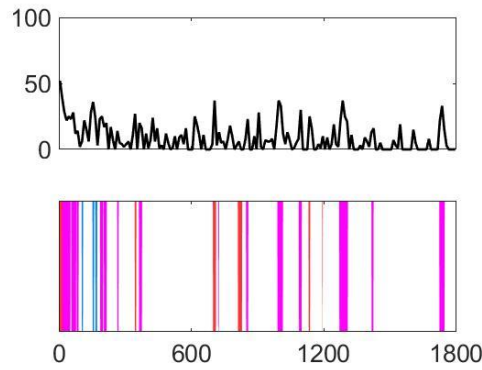

Time (s)

Time (s)

Time (s)

Resident-initiated interaction, Resident-initiated mounting, Resident-initiated fighting  
 Intruder-initiated interaction, Intruder-initiated mounting, Intruder-initiated fighting  
 Mutual interaction

**S4 Fig. Male-male ethograms, group-housed residents.** Ethograms are shown for each male-male trial with a group-housed resident. The top half of each plot shows USV rate over time (total USVs in each 10s-long bin), and the bottom half of each plot shows the occurrence of different non-vocal social behaviors over time. Red, resident-initiated interaction; magenta, resident-initiated mounting; orange, resident-initiated fighting; blue, visitor-initiated interaction; cyan, visitor-initiated mounting; black, visitor-initiated fighting; green, mutual interaction; white, not interacting.

# S5 Fig. (1/2). Male-male ethograms, single-housed resident

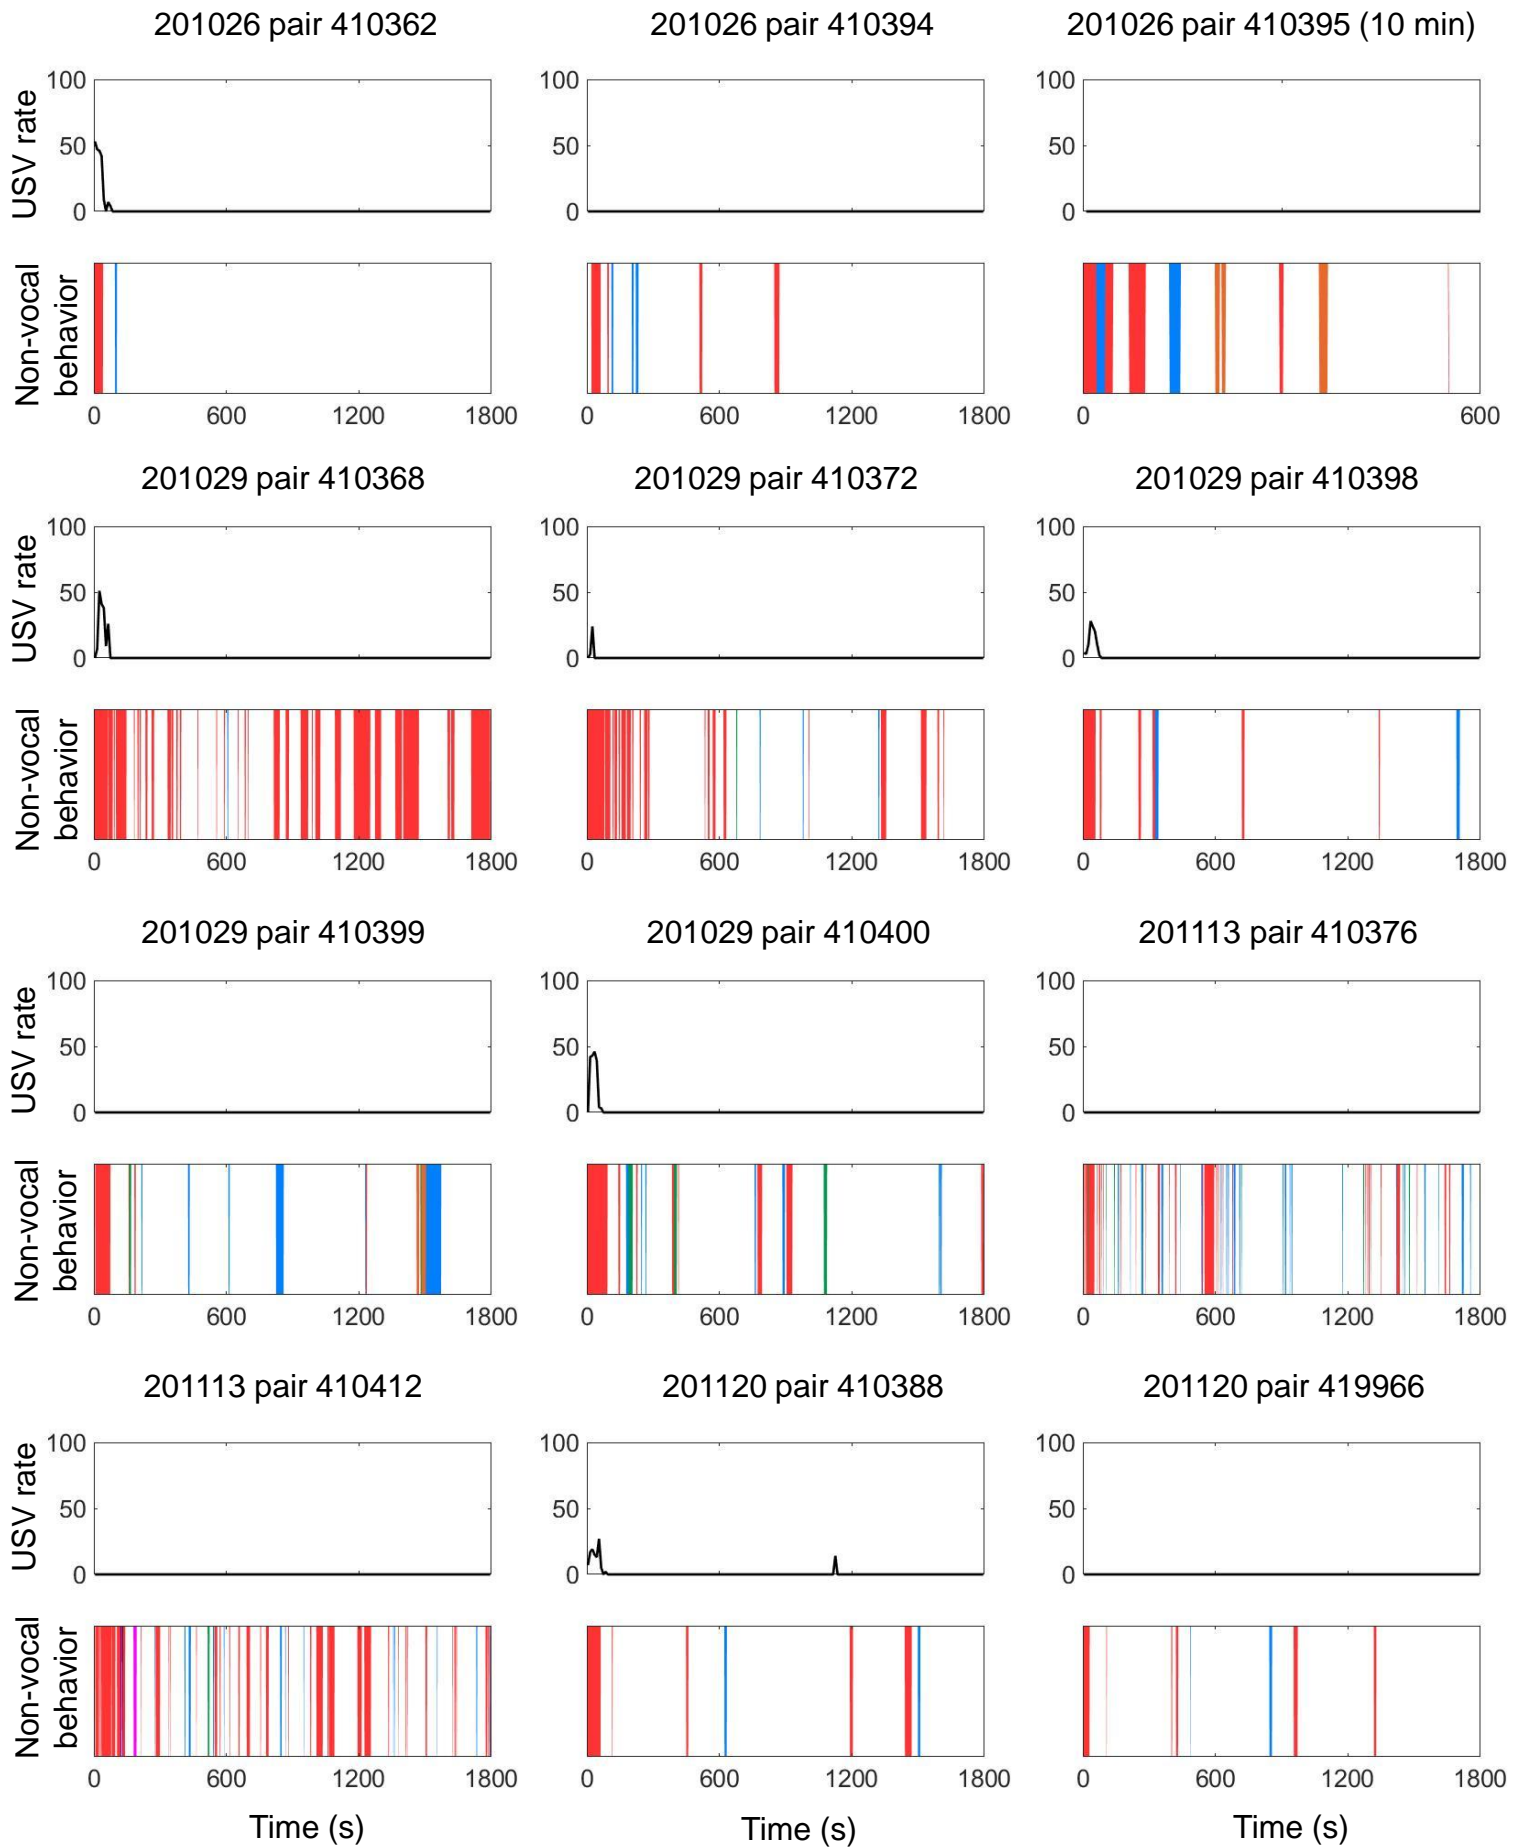

# S5 Fig (2/2). Male-male ethograms, single-housed resident

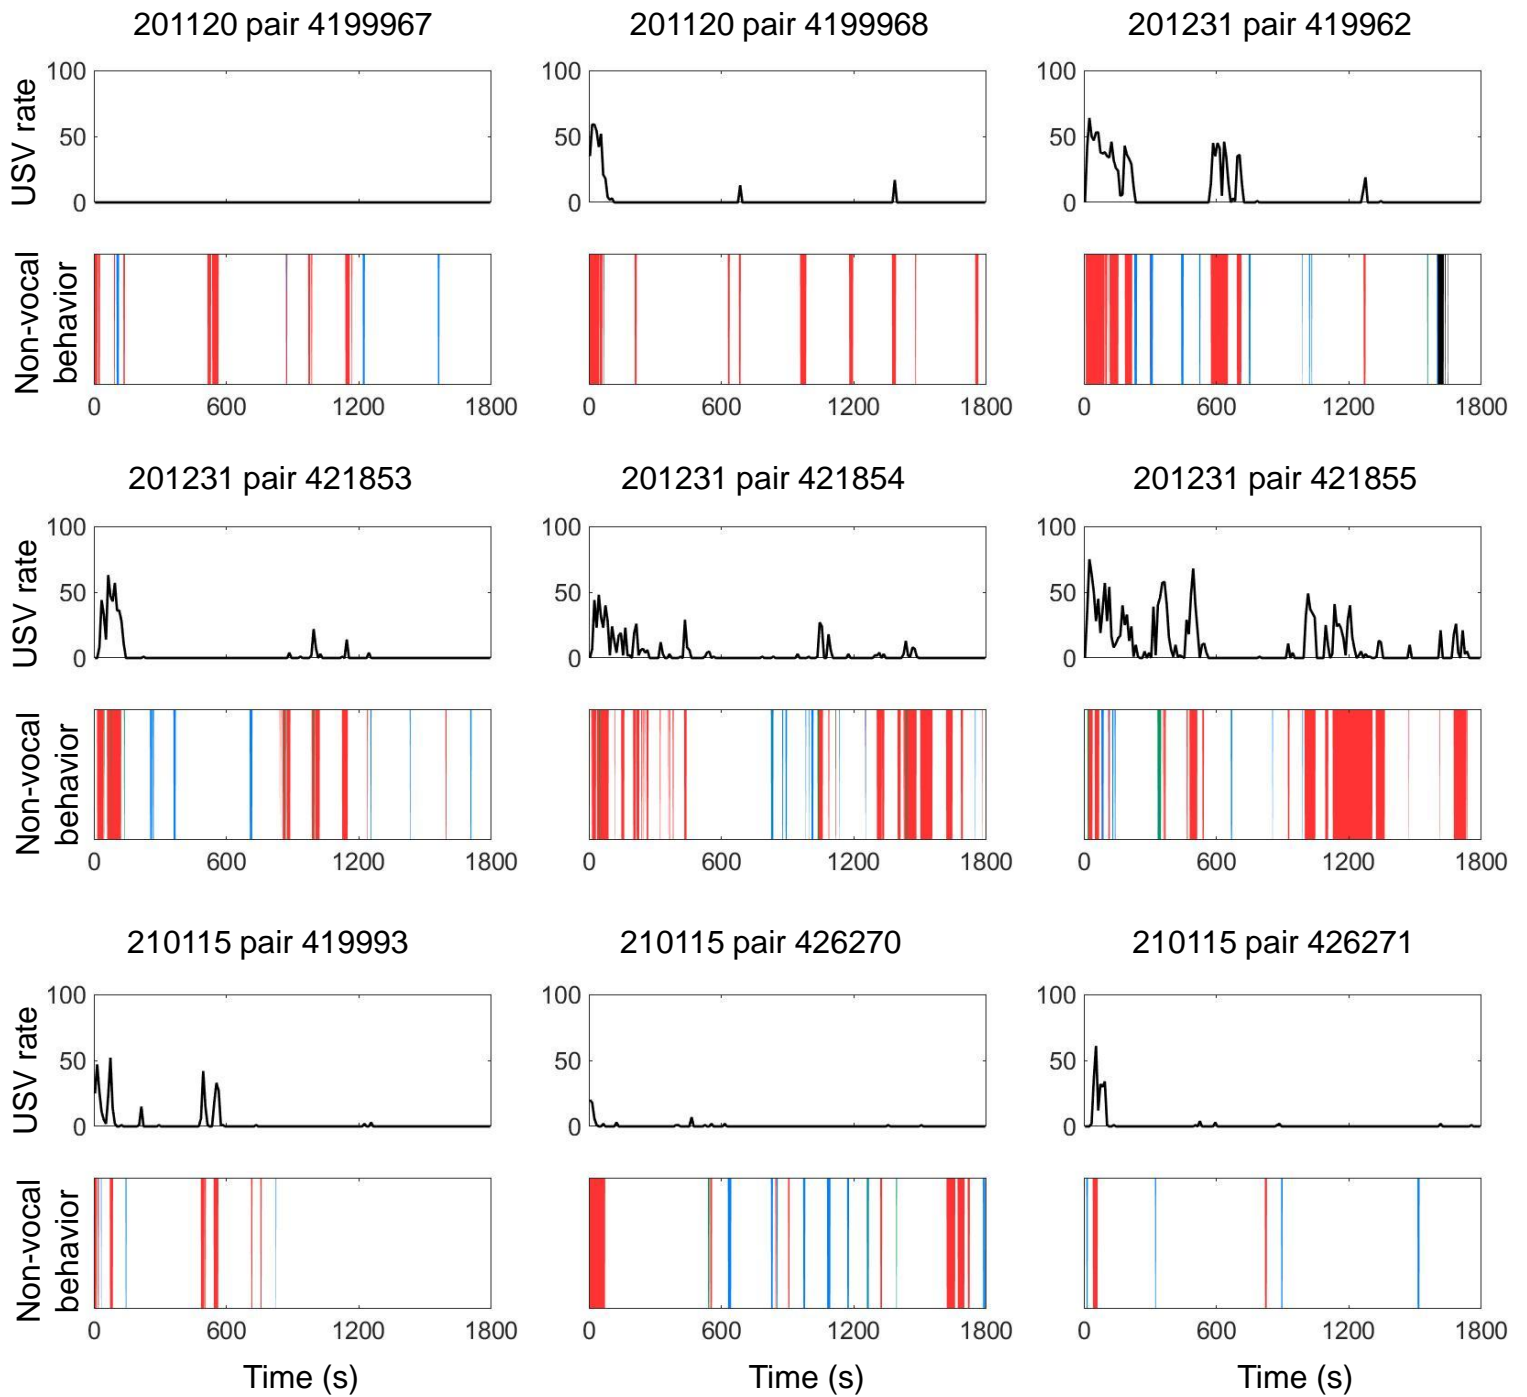

Resident-initiated interaction, Resident-initiated mounting, Resident-initiated fighting  
Intruder-initiated interaction, Intruder-initiated mounting, Intruder-initiated fighting  
Mutual interaction

**S5 Fig. Male-male ethograms, single-housed residents.** Ethograms are shown for each male-male trial with a single-housed resident. The top half of each plot shows USV rate over time (total USVs in each 10s-long bin), and the bottom half of each plot shows the occurrence of different non-vocal social behaviors over time. Red, resident-initiated interaction; magenta, resident-initiated mounting; orange, resident-initiated fighting; blue, visitor-initiated interaction; cyan, visitor-initiated mounting; black, visitor-initiated fighting; green, mutual interaction; white, not interacting.

# S6 Fig (1/2). Male-female ethograms, group-housed resident

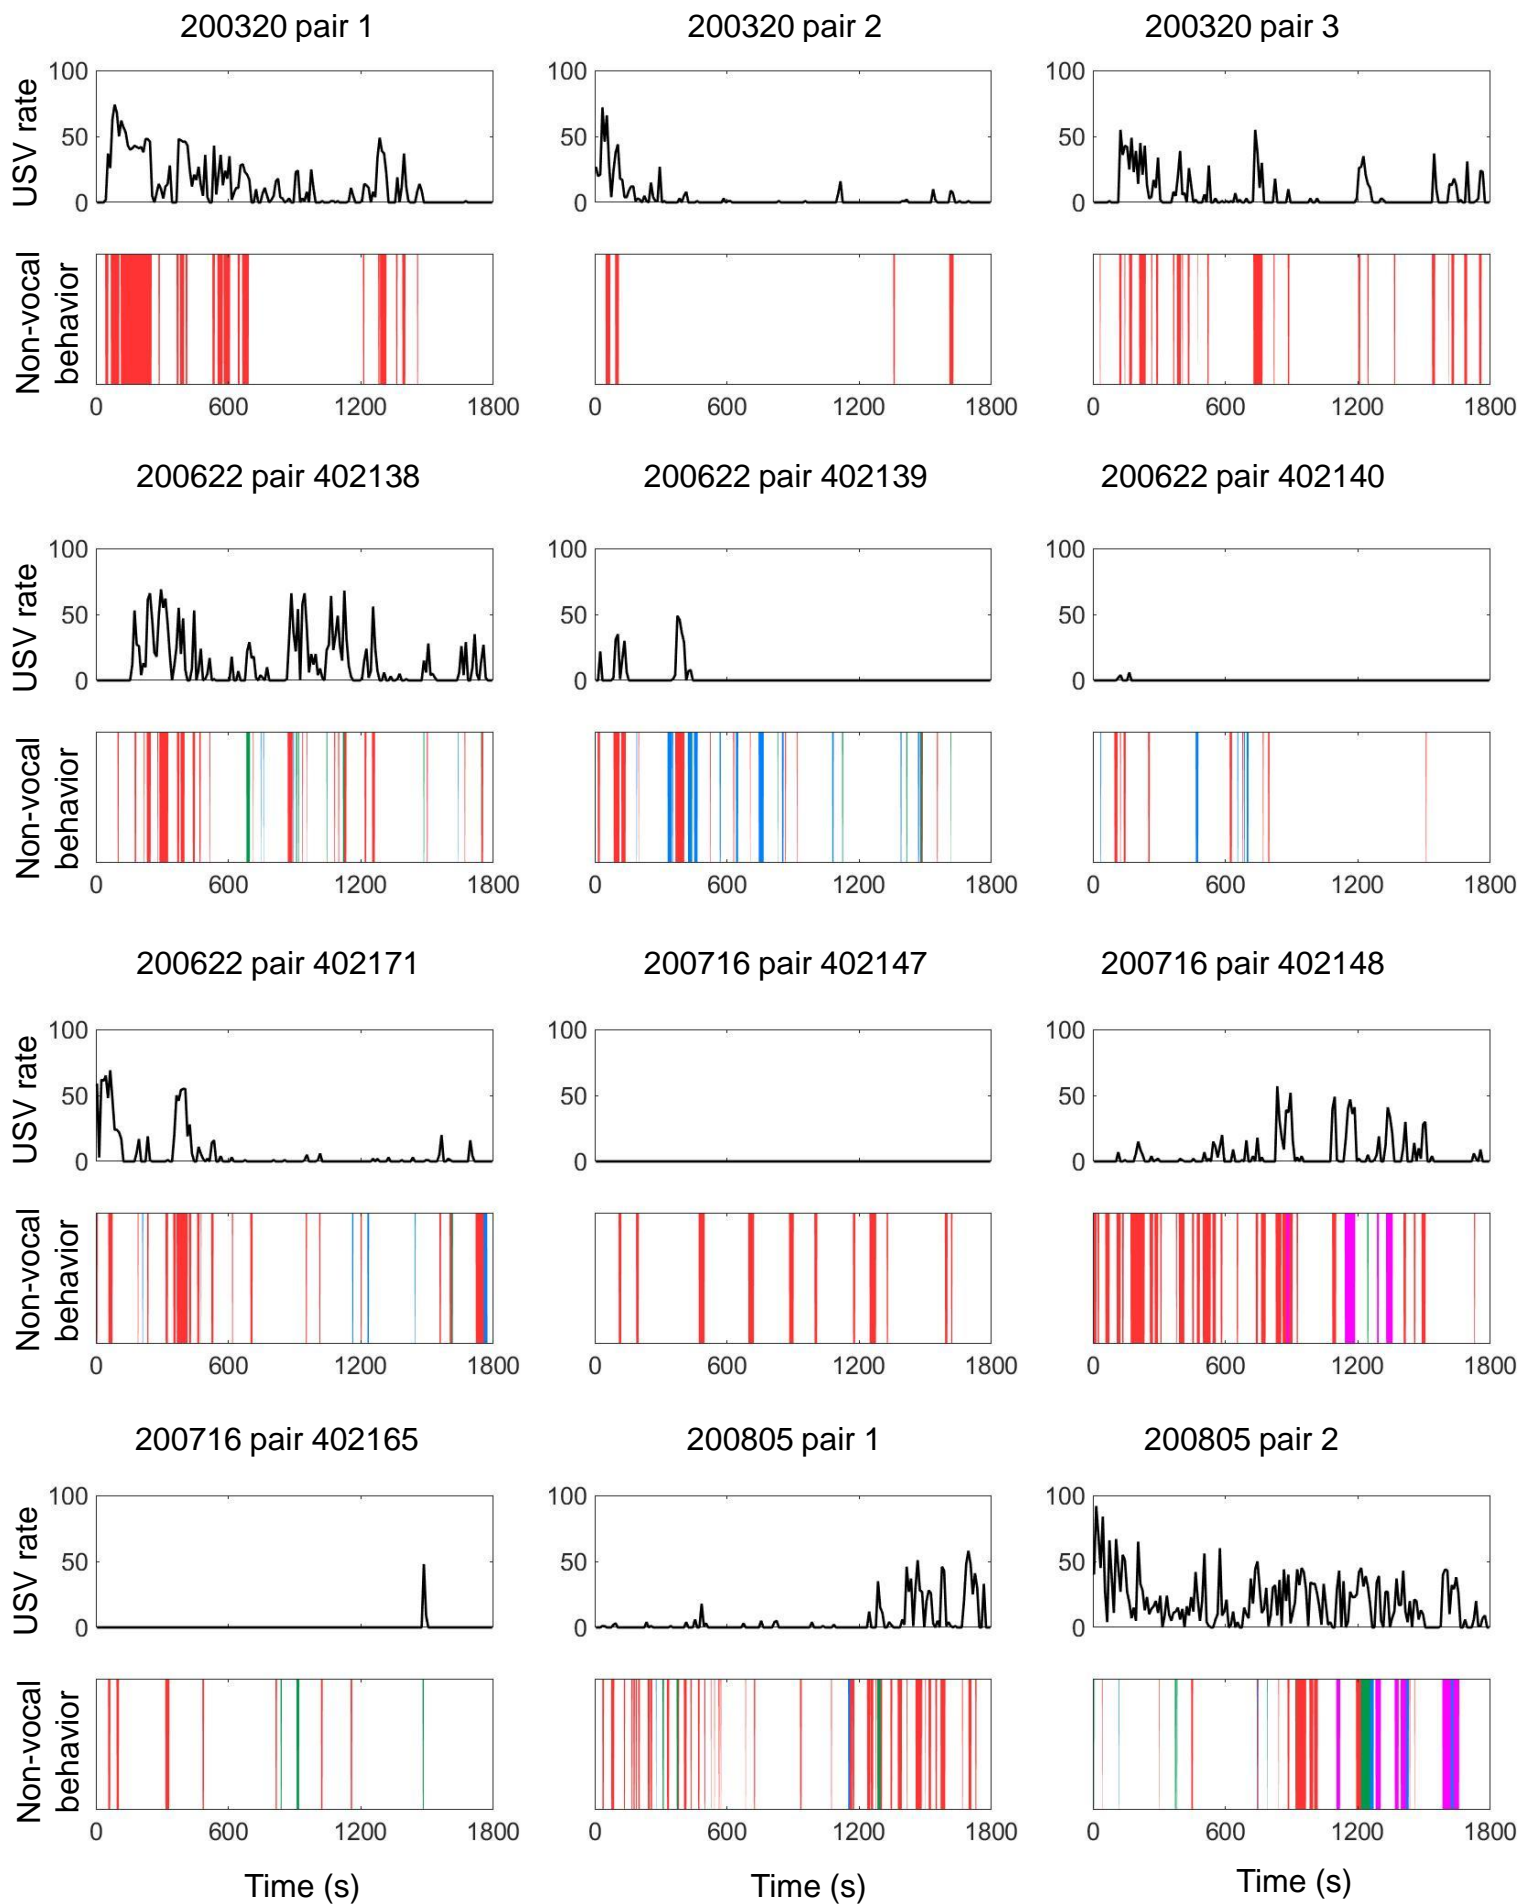

# S6 Fig (2/2). Male-female ethograms, group-housed resident

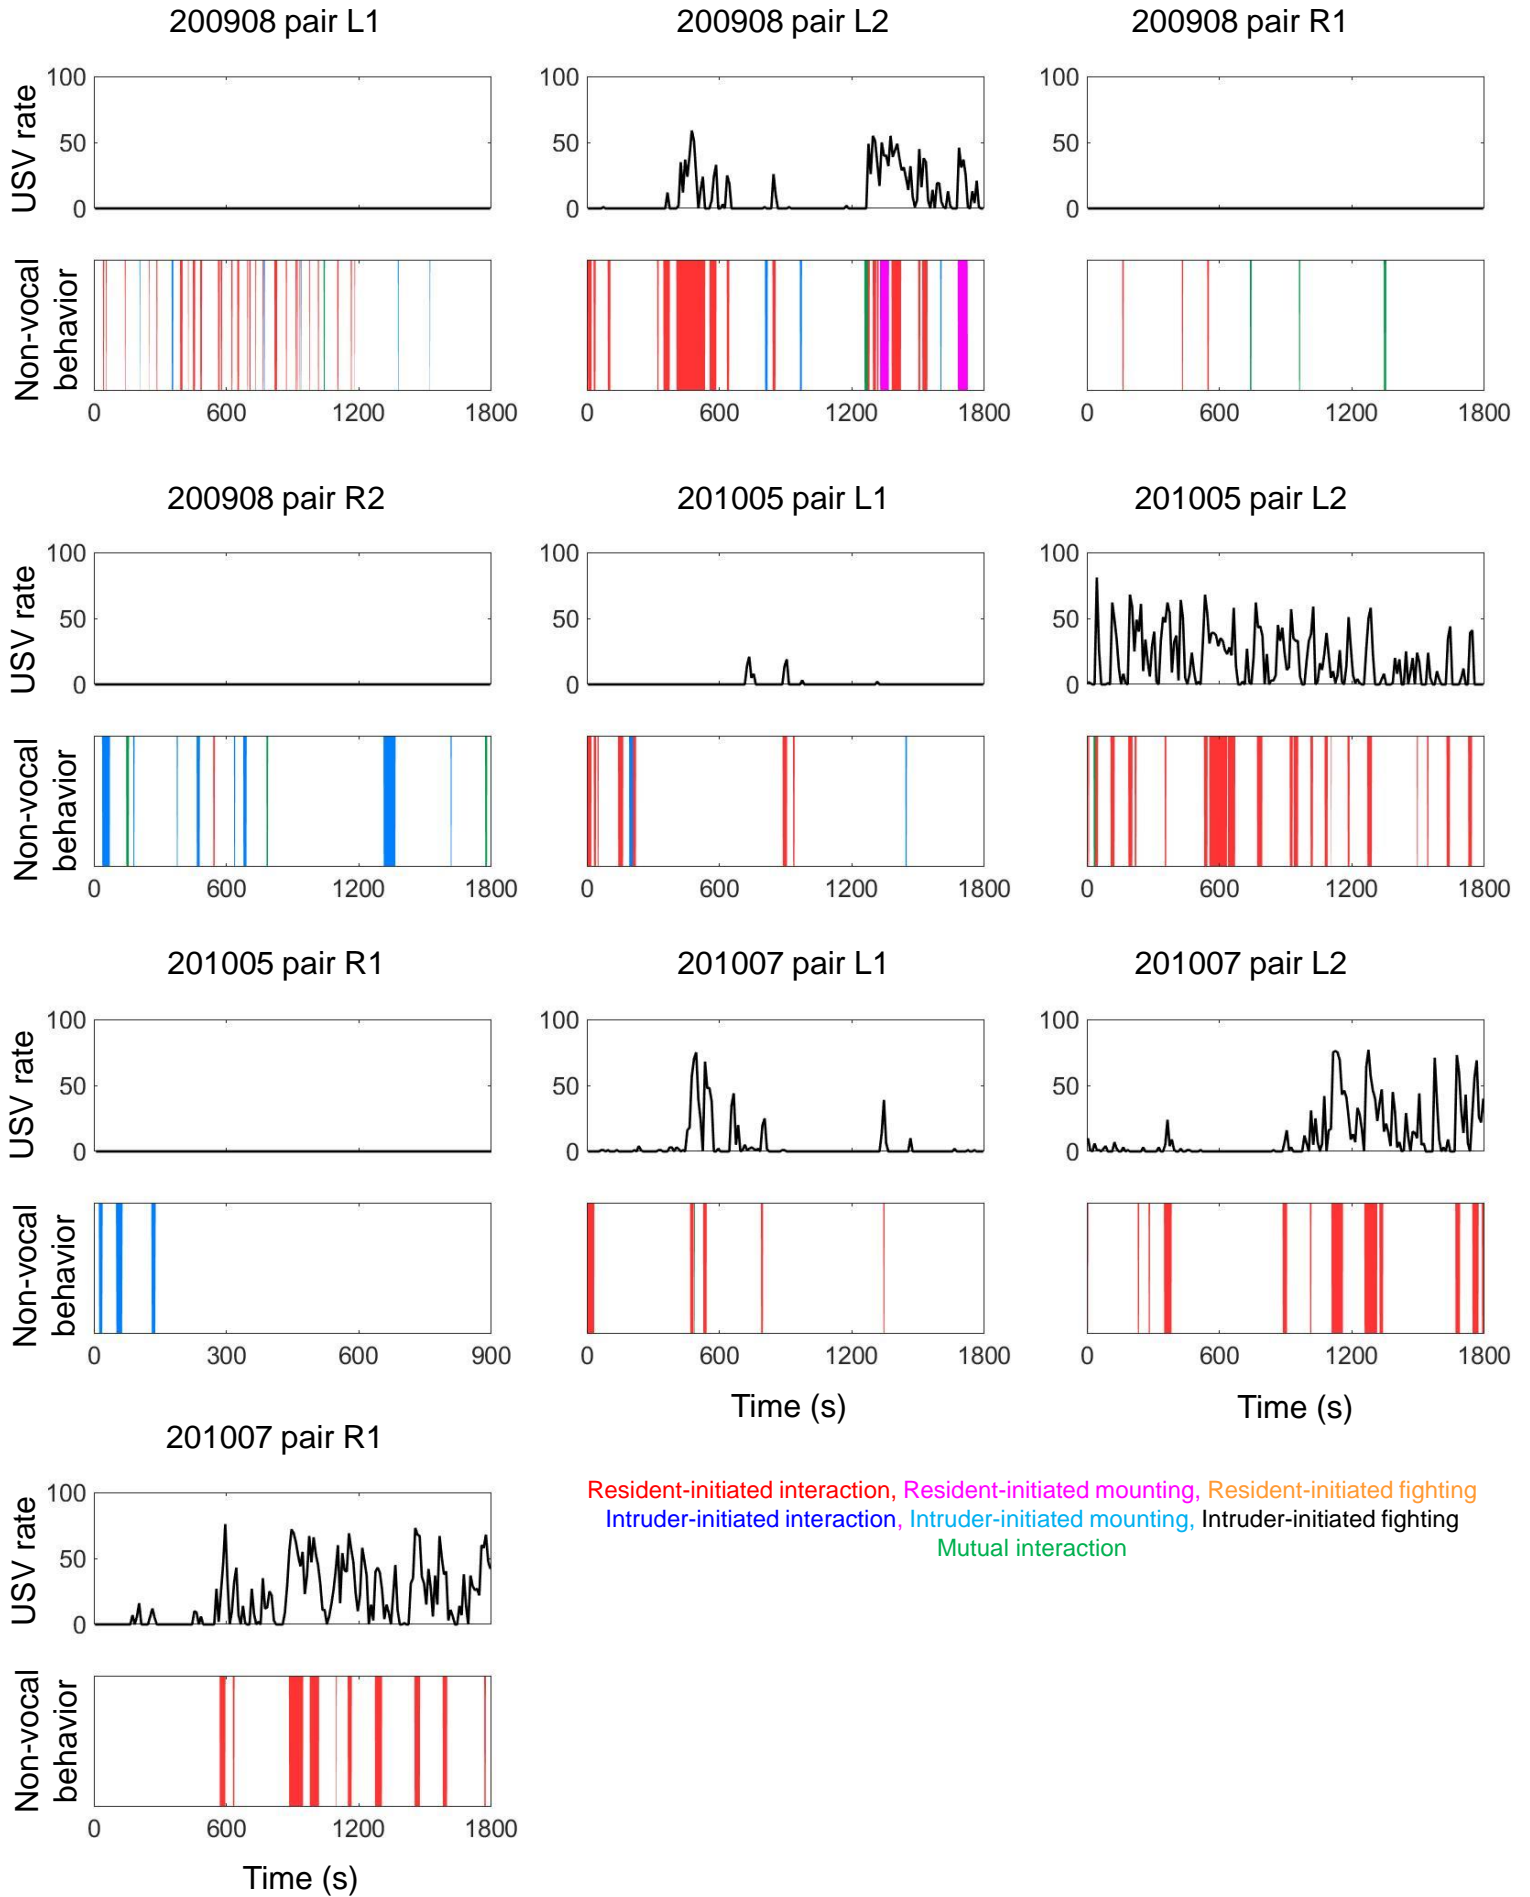



**S6 Fig. Male-female ethograms, group-housed residents.** Ethograms are shown for each male-female trial with a group-housed resident. The top half of each plot shows USV rate over time (total USVs in each 10s-long bin), and the bottom half of each plot shows the occurrence of different non-vocal social behaviors over time. Red, resident-initiated interaction; magenta, resident-initiated mounting; orange, resident-initiated fighting; blue, visitor-initiated interaction; cyan, visitor-initiated mounting; black, visitor-initiated fighting; green, mutual interaction; white, not interacting.

# S7 Fig (1/2). Male-female ethograms, single-housed resident

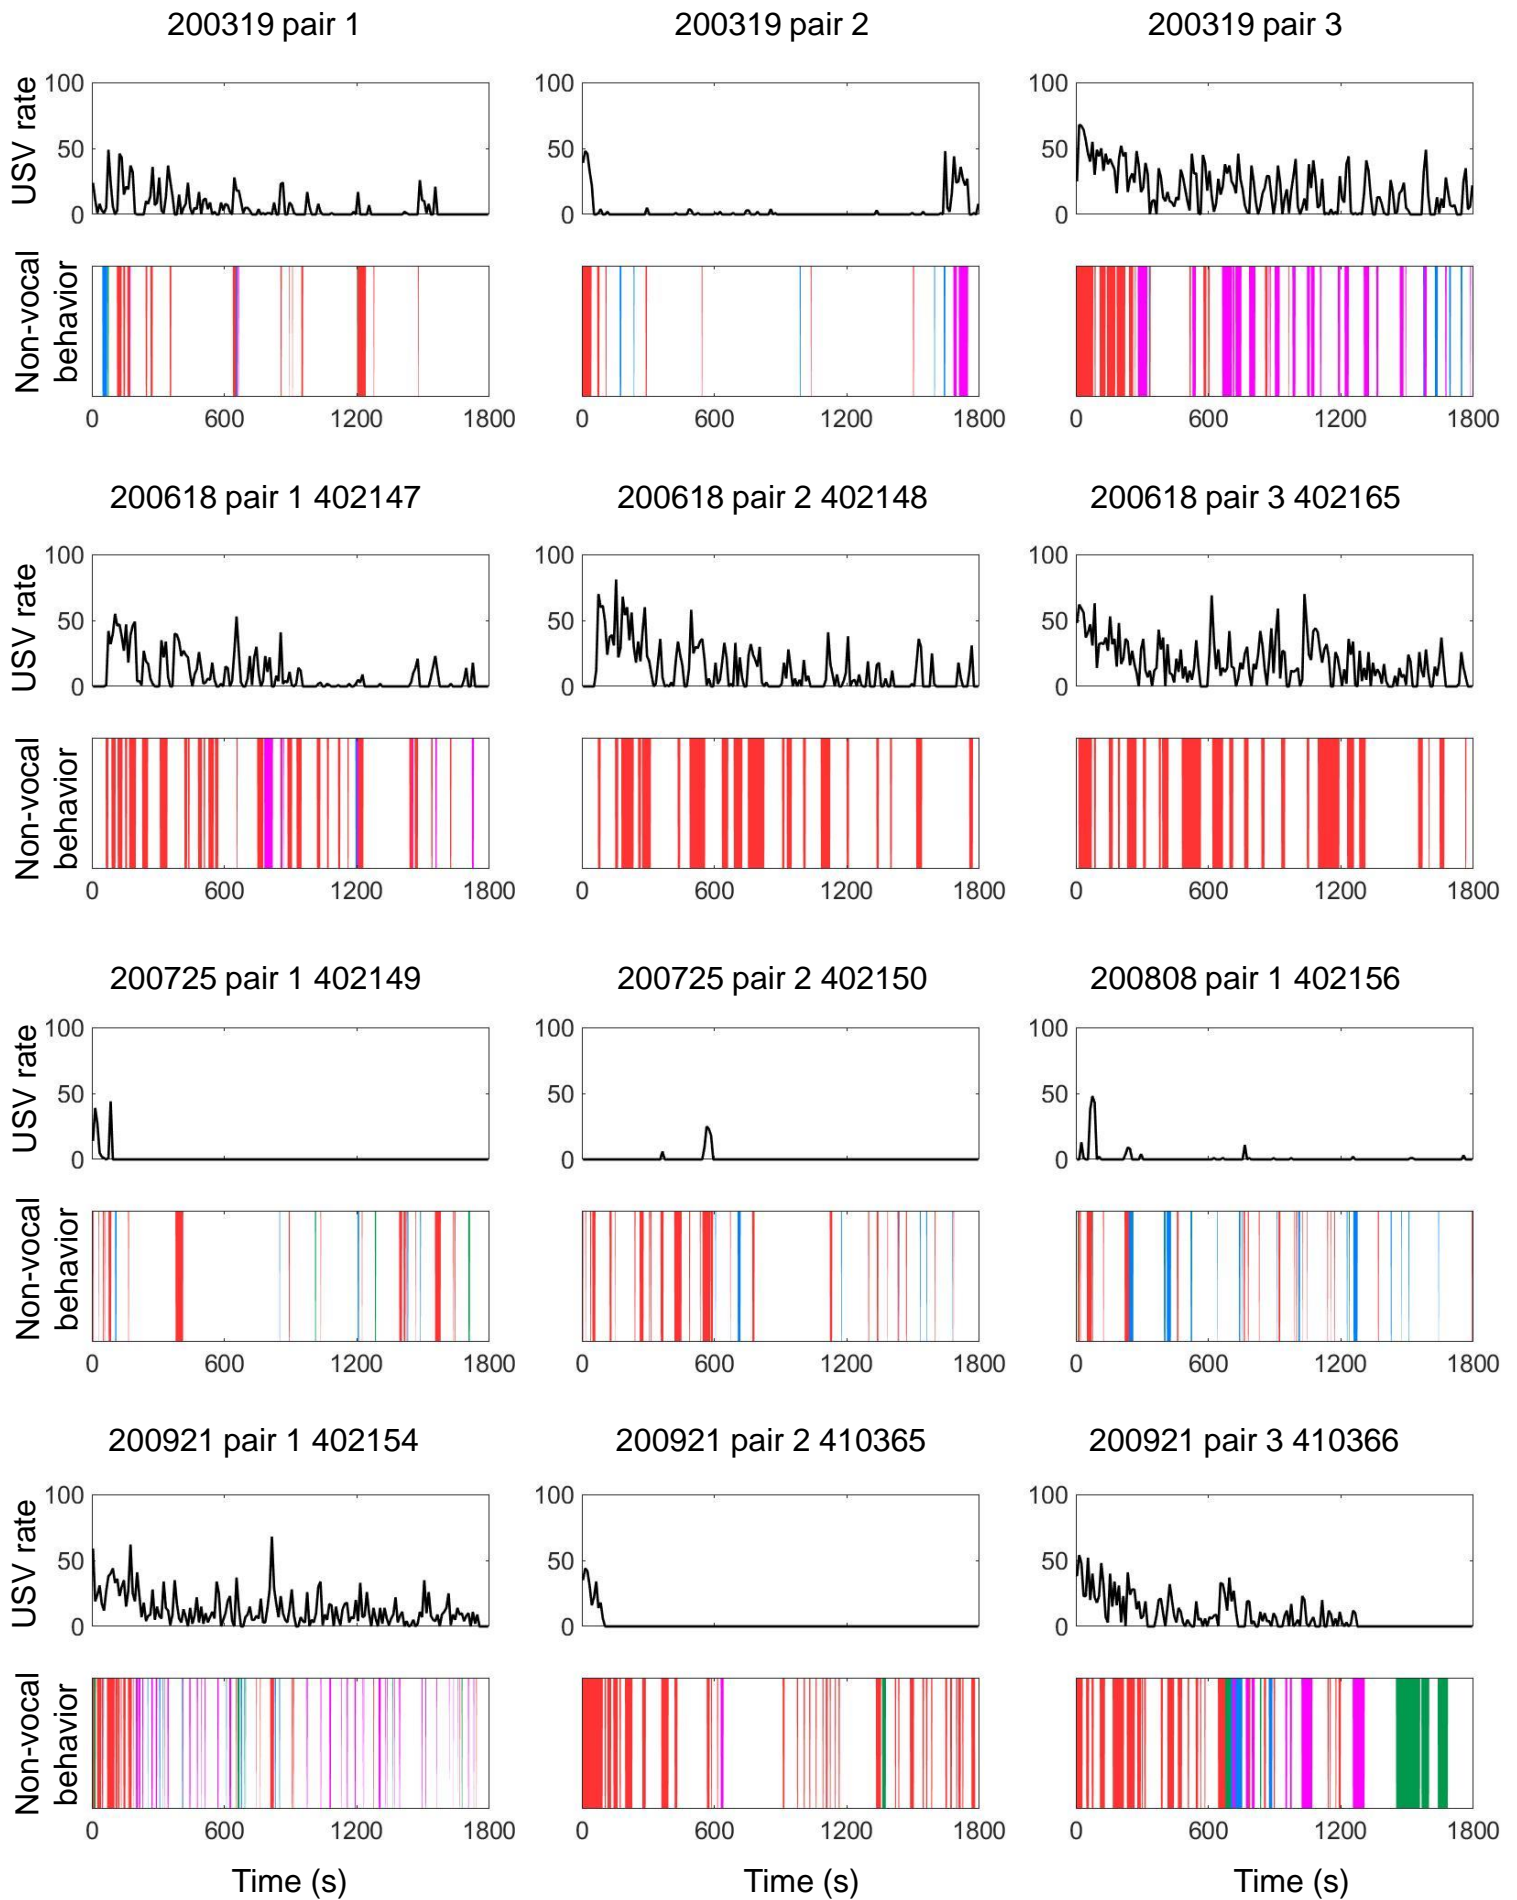

# S7 Fig (2/2). Male-female ethograms, single-housed resident

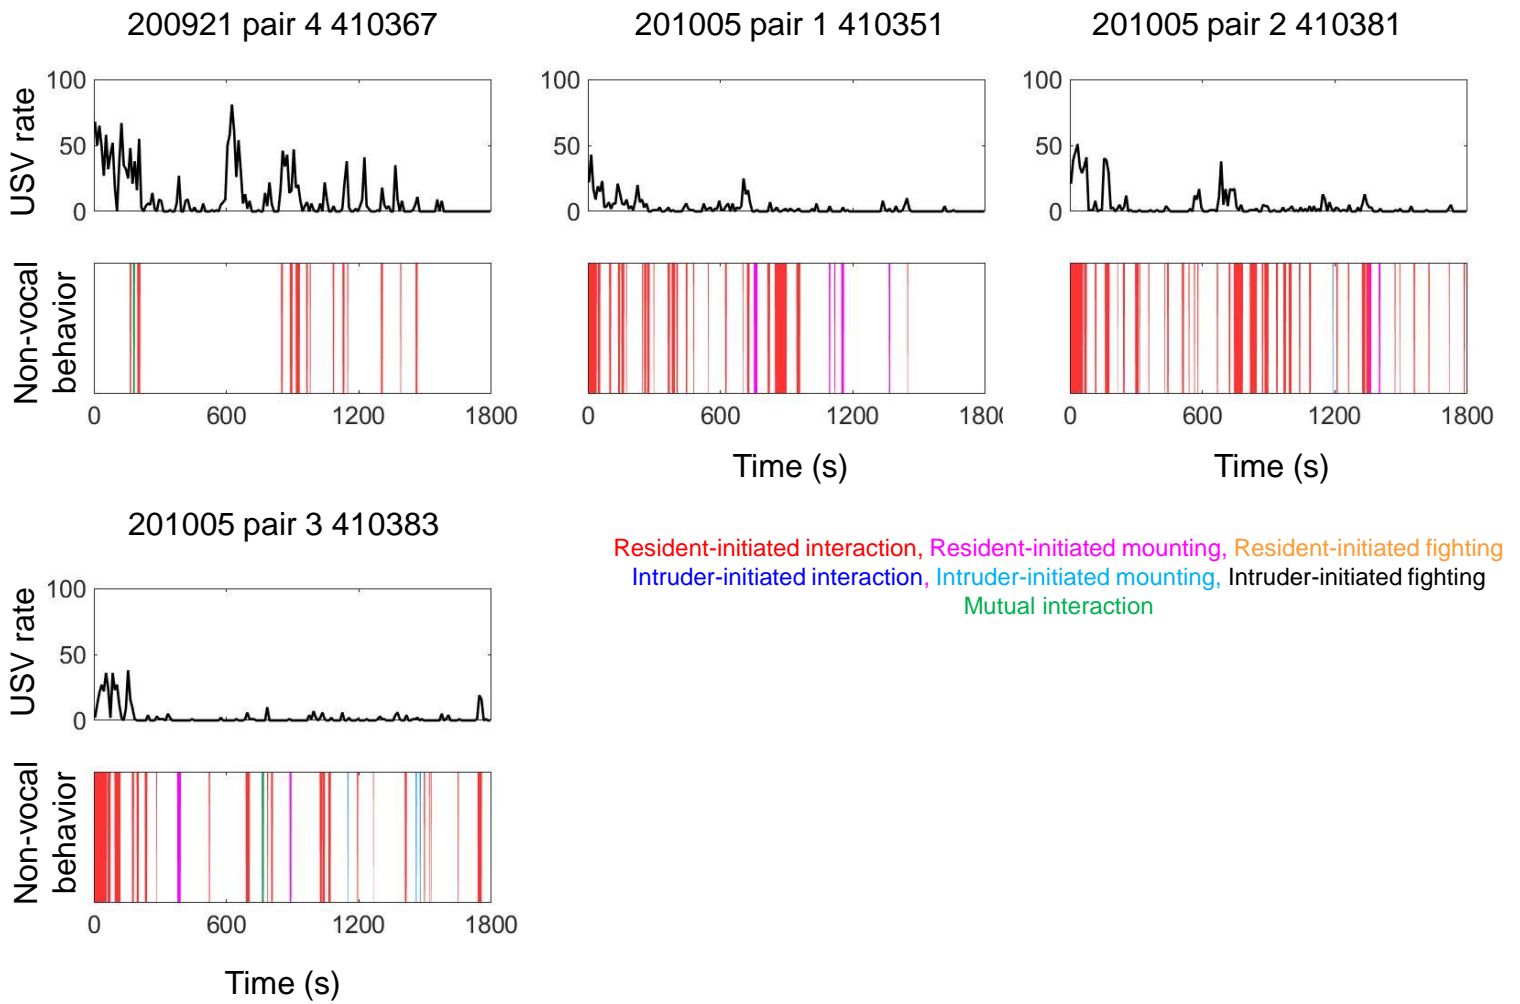

**S7 Fig. Male-female ethograms, single-housed residents.** Ethograms are shown for each male-female trial with a single-housed resident. The top half of each plot shows USV rate over time (total USVs in each 10s-long bin), and the bottom half of each plot shows the occurrence of different non-vocal social behaviors over time. Red, resident-initiated interaction; magenta, resident-initiated mounting; orange, resident-initiated fighting; blue, visitor-initiated interaction; cyan, visitor-initiated mounting; black, visitor-initiated fighting; green, mutual interaction; white, not interacting.

**S1 Table. Statistical Summary**

| <b>Figure Number</b> | <b>Statistical Test</b>                                                | <b>P value</b>           | <b>Description</b>                                      |
|----------------------|------------------------------------------------------------------------|--------------------------|---------------------------------------------------------|
| Fig 1A, left         | Mann Whitney                                                           | <0.0001                  | USV counts, female-female pairs                         |
| Fig 1B, left         | Mann Whitney                                                           | 0.15                     | USV counts, male-male pairs                             |
| Fig 1C, left         | Mann Whitney                                                           | 0.44                     | USV counts, male-female pairs                           |
| Fig S1A              | Mann Whitney                                                           | 0.03                     | USV latency, female-female pairs                        |
| Fig S1B              | Mann Whitney                                                           | 0.61                     | USV latency, male-male pairs                            |
| Fig S1C              | Mann Whitney                                                           | 0.03                     | USV latency, male-female pairs                          |
| text only            | z-test for 2 independent proportions                                   | 0.02                     | proportion of male-male trials with >25 USVs            |
| Fig 2A, left         | Mann Whitney                                                           | <0.001                   | time spent interacting, female-female pairs             |
| Fig 2A, middle       | Mann Whitney                                                           | 0.08                     | time spent interacting, male-male pairs                 |
| Fig 2A, right        | Mann Whitney                                                           | 0.08                     | time spent interacting, male-female pairs               |
| Fig. 2B              | two-way ANOVA, repeated measures on one factor (A, B, and interaction) | <0.0001<0.0001<0.0001    | differences in female-female non-vocal social behaviors |
|                      |                                                                        | <0.0001<0.0001<0.0001    | differences in male-male non-vocal social behaviors     |
|                      |                                                                        | >0.05<br><0.001<br>>0.05 | differences in male-female non-vocal social behaviors   |

|                     |                                                                                    |                        |                                                                                                            |
|---------------------|------------------------------------------------------------------------------------|------------------------|------------------------------------------------------------------------------------------------------------|
|                     |                                                                                    |                        |                                                                                                            |
| Fig. 2B             | Post-hoc tests<br>(resident-initiated,<br>visitor-initiated,<br>mutual)            | <0.0001 0.18. 0.06     | differences in female-<br>female non-vocal social<br>behaviors                                             |
|                     |                                                                                    | 0.003 0.25 0.26        | differences in male-male<br>non-vocal social behaviors                                                     |
| text and<br>Fig. 2C | z-test for 2<br>independent<br>proportions                                         | p<0.001                | proportion of female-<br>female trials with<br>mounting                                                    |
|                     |                                                                                    | p=0.27                 | proportion of male-male<br>trials with mounting                                                            |
|                     |                                                                                    | p=0.005                | proportion of male-female<br>trials with mounting                                                          |
| text only           | z-test for 2<br>independent<br>proportions                                         | 0.41                   | proportion of male-male<br>trials with fights                                                              |
| Fig. 3A,<br>left    | linear regression                                                                  | 0.002<br>0.001         | Female-female, group-<br>housed resident<br>Female-female, single-<br>housed resident                      |
| Fig. 3A,<br>middle  | linear regression                                                                  | 0.83<br>0.02           | Male-male, group-housed<br>resident<br>Male-male, single-housed<br>resident                                |
| Fig. 3A,<br>right   | linear regression                                                                  | 0.003<br>0.006         | Male-female, group-<br>housed resident<br>Male-female, single-<br>housed resident                          |
| Fig. 3B             | two-way ANOVA,<br>repeated measures<br>on one factor<br>(A, B, and<br>interaction) | <0.001 <0.001<br>0.004 | differences in proportion<br>female-female USVs<br>produced during different<br>non-vocal social behaviors |
|                     |                                                                                    | <0.001 <0.001 <0.001   | differences in proportion<br>male-male USVs produced<br>during different non-vocal<br>social behaviors     |
|                     |                                                                                    | >0.05 <0.001 >0.05     | Differences in proportion<br>male-female USVs                                                              |

|         |                                                                |                    |                                                                                                   |
|---------|----------------------------------------------------------------|--------------------|---------------------------------------------------------------------------------------------------|
|         |                                                                |                    | produced during different non-vocal social behaviors                                              |
| Fig. 3B | Post-hoc tests (resident-initiated, visitor-initiated, mutual) | 0.034 0.12 0.05    | differences in proportion female-female USVs produced during different non-vocal social behaviors |
|         |                                                                | 0.006 0.96<br>0.96 | differences in proportion male-male USVs produced during different non-vocal social behaviors     |
